1 **Title:** Fetal cannabidiol (CBD) exposure alters thermal pain sensitivity, cognition, and prefrontal cortex  
2 excitability

3  
4 **One Sentence Summary:** Cannabidiol (CBD) consumption during pregnancy alters offspring behavior and  
5 neuronal excitability in a sex dependent manner in mice.

6  
7 **Authors:** Karli S. Swenson<sup>1</sup>, Luis E. Gomez Wulschner<sup>2</sup>, Victoria M. Hoelscher<sup>2</sup>, Lillian Folts<sup>1</sup>, Kamryn M.  
8 Korth<sup>1</sup>, Won Chan Oh<sup>2</sup>, Emily Anne Bates<sup>1</sup>

9  
10 **Affiliations:**

11 1 Section of Developmental Biology, Department of Pediatrics, University of Colorado Anschutz Medical  
12 Campus, Aurora, Colorado

13  
14 2 Department of Pharmacology, University of Colorado Anschutz Medical Campus, Aurora, Colorado

15  
16 Corresponding Author:

17 Emily Anne Bates, PhD

18 Address: 12800 E 19<sup>th</sup> Avenue, Aurora, CO 80045

19 Telephone: 303-724-8303

20 Email: [Emily.Bates@CUAnschutz.edu](mailto:Emily.Bates@CUAnschutz.edu)

21  
22 The authors declare no conflicts of interest.

23

24

## 25 **Abstract**

26 Thousands of people suffer from nausea with pregnancy each year. Nausea can be alleviated with cannabidiol  
27 (CBD), a primary component of cannabis that is widely available. However, is it unknown how fetal CBD  
28 exposure affects embryonic development and postnatal outcomes. CBD binds and activates receptors that are  
29 important for fetal development and are expressed in the fetal brain, including serotonin receptors (5HT<sub>1A</sub>),  
30 voltage-gated potassium (Kv)7 receptors, and the transient potential vanilloid 1 receptor (TRPV1). Excessive  
31 activation of each of these receptors during fetal development can disrupt neurodevelopment. Here, we test the  
32 hypothesis that intrauterine CBD exposure alters offspring neurodevelopment and postnatal behavior. We show  
33 that fetal CBD exposure sensitizes male offspring to thermal pain in a TRPV1 dependent manner. We show that  
34 fetal CBD exposure decreases cognitive function in female CBD-exposed offspring. We demonstrate that fetal  
35 CBD exposure increases the minimum current required to elicit action potentials and decreases the number of  
36 action potentials in female offspring layer 2/3 prefrontal cortex (PFC) pyramidal neurons. Fetal CBD exposure  
37 reduces the amplitude of glutamate uncaging-evoked excitatory post-synaptic currents. Combined, these data  
38 show that fetal CBD exposure disrupts neurodevelopment and postnatal behavior in a sex-dependent manner.

## 39 40 **Introduction**

41 The nausea and vomiting of morning sickness is debilitating for thousands of pregnant patients each year<sup>1</sup>.  
42 Pregnant people are drawn to use cannabis for its anti-emetic, or anti-nausea, properties because they believe it  
43 to be safe<sup>2</sup>. Cannabis has two primary component parts, cannabidiol (CBD) and tetrahydrocannabinol (THC),  
44 along with minor cannabinoids and terpenes. Although research quantifying CBD consumption in a pregnant  
45 population is limited, THC metabolites were detected in cord blood samples from twenty-two percent of pregnant  
46 people under the age of twenty-five tested in Colorado, suggesting CBD consumption in the same group<sup>3</sup>. CBD  
47 is an effective anti-emetic medication, but does not induce the psychoactive properties of THC<sup>4</sup>. CBD has become  
48 widely available since it was removed from schedule 1 drug classification in 2018<sup>5</sup>. In addition to the number of

49 pregnant people who consume CBD as a component of whole cannabis, it is likely that a population of pregnant  
50 patients consume CBD alone<sup>6</sup> due to the availability of CBD, and its anti-emetic properties.

51  
52 CBD diffuses through maternal-placental-fetal circulation<sup>6</sup>. Animal models show that lipophilic CBD  
53 accumulates in the fetal brain, liver, and gastrointestinal tract<sup>6</sup>. CBD binds and activates receptors important for  
54 fetal brain development including the 5HT<sub>1A</sub> serotonin receptor, heat-activated transient potential vanilloid  
55 receptor one (TRPV1) calcium channels<sup>7</sup>, and voltage-gated Kv7 receptor potassium channel<sup>8,9,10</sup>, among others.

56  
57 Excessive TRPV1 activation in neural crest cells confers neural tube defects akin to those induced by maternal  
58 fever<sup>11</sup>, suggesting that increased activation of TRPV1 affects developmental processes. Fetal overactivation of  
59 TRPV1 induces anxiety behaviors in mice<sup>12</sup>. Excessive activation of TRPV1 alters excitatory innervation in  
60 hippocampal neurons and mediates action potential threshold<sup>13</sup>. CBD also activates TRPV2, a calcium channel  
61 with a higher temperature threshold than TRPV1<sup>14</sup>. Excessive activation of TRPV2 during development alters  
62 axon extension and the release of calcitonin gene related peptide (CGRP), a proinflammatory signaling molecule,  
63 in the dorsal root ganglion<sup>14</sup>. Fetal cannabis exposure is associated with increased anxiety in humans, but it is  
64 unknown whether CBD contributes to this association<sup>15</sup>. TRPV1 is expressed in the hypothalamus and the rostral  
65 hindbrain in rat, primate, and human tissue<sup>16</sup>. TRPV1 is expressed in cortical layers 3 and 5 of the hippocampus,  
66 central amygdala, habenula, striatum, hypothalamus, centromedial, and paraventricular thalamic nuclei,  
67 substantia nigra, reticular formation, locus coeruleus, cerebellum, and inferior olive in adult rodent brains<sup>17</sup> and  
68 in the dorsomedial hypothalamus, hippocampus, dorsal root ganglion cells, supramammillary nucleus, and  
69 periaqueductal grey in fetal mice<sup>16</sup>. These limbic regions mediate behavioral and emotional responses to stimuli<sup>18</sup>.  
70 Because CBD activates TRPV1 and TRPV2, and these calcium channels are expressed in the fetal brain, and their  
71 excessive activation during fetal development is associated with negative developmental effects, we hypothesize  
72 that fetal CBD exposure could disrupt brain development and postnatal behavior.

73

74 Excessive fetal serotonin signaling harms neuronal development. Overexpression of 5HT<sub>1A</sub> during mouse fetal  
75 and early postnatal development decreases adult anxiety behaviors on elevated plus maze test and free exploratory  
76 paradigm, and decreases spatial learning via the Morris water maze compared to wild type mice<sup>19</sup>. Excessive  
77 activation of 5HT<sub>1A</sub> during fetal development decreases neurogenesis, decreases neuron network complexity,  
78 alters neuron refinement, delays sensory-evoked potentials, decreases sensory evoked firing, and decreases  
79 amplitude of sensory evoked potentials<sup>20</sup>. Depletion of tryptophan, the molecular precursor to serotonin, impairs  
80 cognition in humans and mice<sup>21,22</sup>. 5HT receptor transcripts are expressed from embryonic day (E)14.5-16.5 in  
81 the thalamus, hippocampus, and in a medial to lateral gradient in the cortex in mice<sup>23</sup>. Human fetal brains have  
82 highest expression of 5HT<sub>1A</sub> between the sixteenth and twenty-second weeks of gestation in the cortex and the  
83 hippocampus<sup>24</sup>. CBD activates 5HT<sub>1A</sub>, and excessive activation is associated with negative outcomes in the fetal  
84 brain. We hypothesized that fetal CBD exposure could disrupt similar processes through 5HT<sub>1A</sub> activation.

85

86 CBD binds and activates Kv7.2 and Kv7.3, which are expressed in the brain throughout embryonic and postnatal  
87 development<sup>25</sup>. Kv7.2 and Kv7.3 gain-of-function mutations are associated with increased rates of human  
88 intellectual disability and epileptic encephalopathy<sup>26</sup>. Kv7.2/3 agonism decreases relative refractory periods and  
89 increases post-conditioned super-excitability of neurons in cultured human myelinated axons<sup>27</sup>. Alterations in  
90 mouse Kv7.2 and 7.3 activity during development are associated with lasting developmental disorders including  
91 intellectual disabilities, memory and behavioral deficits, and disruption of GABAergic inhibitory neuron in the  
92 hippocampus humans and neuronal cell culture, respectively<sup>28</sup>. Antagonism of Kv7 channels is under current  
93 investigation for potential in improving cognition and memory<sup>29</sup>. CBD activates Kv7 receptors which are  
94 expressed in the fetal brain and excessive activation is associated with negative neurodevelopmental effects. We  
95 hypothesize that fetal CBD exposure could excessively activate Kv7.2 and Kv7.3 to disrupt brain development  
96 and postnatal behavior.

CBD is commonly orally consumed<sup>30</sup>. We administered 50mg/kg of CBD dissolved in sunflower oil or sunflower oil alone to C57BL6 female dams daily from E5 through birth. We selected 50mg/kg in accordance with the national institutes of drugs of abuse (NIDA) recommendation for 5mg/kg via intraperitoneal injection for cannabis research multiplied by 10 to account for the first pass metabolism in the dam liver. We selected oral gavage for a route of administration to model oral CBD consumption with accurately measured daily doses. Offspring were subjected to a battery of behavioral testing from puberty to adulthood to determine if fetal CBD exposure alters postnatal behavior.

We show that fetal CBD exposure disrupts neurodevelopment and postnatal behavior. We show that CBD-exposed male offspring are sensitized to thermal pain in a TRPV1-dependent manner. We found fetal CBD exposure did not affect offspring anxiety, spatial memory, or compulsivity. We show fetal CBD exposure reduces cognition in female mice. We demonstrate that fetal CBD exposure reduces excitability of pyramidal neurons in the prefrontal cortex in postnatal (P)14-21 female mice. Female CBD-exposed offspring require larger currents and more depolarized voltage to elicit action potentials and elicit fewer action potentials at a given current. Fetal CBD exposure reduced the amplitude of glutamate uncaging-evoked excitatory post-synaptic currents in female prefrontal cortical slices. CBD metabolites were not retained in pup plasma by P8 suggesting that fetal CBD exposure changes fetal neuronal physiology and neurodevelopment to impact postnatal behavior.

## Results

### CBD metabolites are present in dam, fetal, and neonatal blood plasma

We administered 50mg/kg CBD dissolved in sunflower oil or sunflower oil alone (vehicle) via oral gavage daily from E5 through birth to C57BL6J or *TRPV1*<sup>KO/KO</sup> female mice (Figure 1A). CBD is metabolized into 6a-hydroxy cannabidiol, 7-hydroxy cannabidiol, carboxy-cannabidiol, and cannabidiol glucuronide and each crosses the

21 placenta. We used liquid chromatography tandem mass spectrometry to quantify CBD and its metabolites in dam  
22 and pup plasma from two hours after dosing on E18.5 and postnatal day (P) 0, P4, P8, and P12. We found  $630.93$   
23  $\pm 383.72$  ug/ml CBD, N=3 dams at E18.5,  $250.24 \pm 130.51$  ug/ml CBD, N=4 at P0, and  $2.05$  ug/ml  $\pm 1.52$  CBD,  
24 N=3 at P4 in dam plasma. We found  $588.57 \pm 253.32$  ug/ml CBD, N=3 pooled litters at E18.5,  $139.73 \pm 98.39$   
25 ug/ml CBD, N=6 pooled litters at P0, and  $0.83 \pm 0.53$  ug/ml CBD, N=4 pooled litters at P4 (Figure 1B). Additional  
26 CBD metabolite levels for 6a-hydroxy cannabidiol, 7-hydroxy cannabidiol, carboxy-cannabidiol, and cannabidiol  
27 glucuronide can be found in supplemental table 1. By P8, dams and pups had fully cleared the CBD and its  
28 metabolites were below the limit of detection in the plasma (Figure 1B), suggesting that any behavioral or  
29 physiological differences between CBD and vehicle-exposed offspring are due to changes in development rather  
30 than acute effects of CBD.

### 32 **CBD exposure does not alter pregnancy length, gestational weight gain, litter size, or sex of offspring**

33 To determine how CBD consumption during pregnancy affects maternal factors, we quantified number of pups  
34 per litter, pup survival, average pup weight, pup sex ratios, gestation length and dam gestational weight gain in  
35 vehicle and CBD dosed dams and their litters. We found that CBD exposure did not alter any of these factors  
36 (Figure 1D-I). We conclude that CBD consumption during pregnancy, from E5 through birth, does not induce  
37 detectable changes in these maternal factors or litter composition compared to vehicle.

### 39 **Fetal CBD exposure increases thermal pain sensitivity in male, but not female, offspring**

40 CBD activates TRPV1, a heat-gated calcium channel<sup>31</sup>. We hypothesized that fetal CBD exposure would  
41 excessively activate TRPV1 channels and alter the development of thermal pain circuits. We used the Hargreaves  
42 test to measure thermal pain sensitivity in wild type and *TRPV1<sup>KO/KO</sup>* vehicle or CBD-exposed offspring. The  
43 Hargreaves test measures the latency to response to a thermal stimulus. Fetal CBD exposure did not affect female  
44 sensitivity to thermal pain ( $12.25 \pm 1.46$  seconds, N=11 vehicle-exposed versus  $14.14 \pm 1.21$  seconds, N=11

45 CBD-exposed,  $P=0.331$ , t-test). *TRPV1<sup>KO/KO</sup>* vehicle and CBD-exposed females were similarly sensitive to  
46 thermal stimuli ( $16.76 \pm 0.60$  seconds,  $N=7$  vehicle-exposed *TRPV1<sup>KO/KO</sup>*,  $14.98 \pm 0.82$  seconds  $N=8$  CBD-  
47 exposed *TRPV1<sup>KO/KO</sup>*,  $P=0.11$ , t-test. Figure 2A). Female pain tolerance varies with estrus cycle stage<sup>32</sup>. We  
48 repeated the Hargreaves test with female offspring controlling for estrus cycle stage and found no differences in  
49 thermal pain sensitivity based on fetal CBD exposure (Figure 2A ( $9.62 \pm 1.13$  seconds  $N=9$  vehicle-exposed  
50 estrus compared to  $7.79 \pm 0.93$  seconds,  $N=9$  CBD-exposed estrus females,  $P=0.23$ , t-test). Fetal CBD exposure  
51 also did not affect thermal sensitivity in female mice that were not in estrus ( $11.11 \pm 0.78$  seconds  $N=11$  vehicle-  
52 exposed females  $10.99 \pm 1.18$  seconds  $N=7$  CBD-exposed female mice,  $P=0.93$ , t-test). Interestingly, CBD-  
53 exposed male offspring were significantly more sensitive to thermal pain ( $11.58 \pm 0.64$  seconds,  $N=8$  vehicle-  
54 exposed vs  $6.87 \pm 3.27$  seconds,  $N=8$  CBD-exposed,  $P=4.99E-8$ , t-test). The effect of CBD on thermal sensitivity  
55 in males is dependent on the TRPV1 receptor. CBD exposure did not impact thermal sensitivity in *TRPV1<sup>KO/KO</sup>*  
56 male offspring ( $11.09 \pm 0.65$  seconds,  $N=8$  vehicle-exposed, vs.  $12.43 \pm 1.61$  seconds,  $N=8$ ,  $P=0.45$ , t-test, Figure  
57 2A). These data show that oral consumption of 50 mg/kg CBD during pregnancy was sufficient to increase  
58 thermal pain sensitivity in adult male offspring.

### 60 **Fetal CBD exposure does not alter offspring anxiety**

61 TRPV1 activity fetal development mediates offspring anxiety in mice<sup>12,33</sup>. Clinical studies show children exposed  
62 to whole cannabis in-utero have higher rates of anxiety and ADHD at puberty<sup>15</sup>. To determine if fetal CBD  
63 exposure affects offspring anxiety, we conducted the open field maze at six weeks old, the light dark box at eight  
64 weeks old, and the elevated zero maze test at ten weeks old (Figure 2D-AG). We found no differences in anxiety  
65 by any measure in male or female offspring based on fetal CBD exposure (statistics in supplemental table 1).  
66 Time in center zone of the open field test was not changed by fetal CBD exposure ( $90.20 \pm 11.05$  seconds,  $N=13$   
67 vehicle-exposed females versus  $89.19 \pm 6.36$  seconds,  $N=25$  CBD-exposed females,  $P = 0.933$ , t-test,  $89.40 \pm$   
68  $10.05$  seconds ( $N=19$  vehicle-exposed males),  $90.76 \pm 6.00$  seconds ( $N=23$  CBD-exposed males),  $P=0.904$ , t-test.

59 Duration in the open area of the light/dark box was equivalent between exposure groups ( $263.09 \pm 17.52$  seconds  
60 (N=6 vehicle-exposed females),  $234.12 \pm 11.89$  seconds (N=21 CBD-exposed-females),  $P=0.225$ , Wilcoxon rank  
61 sum test.  $233.82 \pm 18.18$  seconds (N=13 vehicle-exposed males),  $246.27 \pm 14.30$  seconds (N=24 CBD-exposed  
62 males),  $P=0.239$  Wilcoxon rank sum test. Time in the open area of the elevated zero maze test was equivalent  
63 between exposure groups ( $87.43 \pm 9.16$  seconds, (N=13 vehicle-exposed females),  $93.41 \pm 6.96$  seconds, (N=25  
64 CBD-exposed females),  $P=0.977$ , Wilcoxon rank sum test.  $77.12 \pm 6.22$  seconds (N=23 vehicle-exposed males),  
65  $81.75 \pm 5.76$  seconds (N=24 CBD-exposed males),  $P=0.395$ , Wilcoxon rank sum test. Additional measures for  
66 each anxiety test can be found in Supplemental Table 1. We found significant differences between *TRPV1*<sup>KO/KO</sup>  
67 and wild type mice, as previously characterized<sup>33</sup> (Supplemental Figure 1). *TRPV1*<sup>KO/KO</sup> mice also showed no  
68 differences in anxiety measures based on CBD exposure alone (Supplemental Figure 1). These data show that  
69 offspring anxiety as measured by the open field test, light/dark box, and elevated zero maze is not affected by  
70 fetal CBD exposure.

### 71 72 **Fetal CBD exposure does not affect offspring compulsivity**

73 To determine the effect of fetal CBD exposure on offspring compulsivity, we conducted the Marble Burying Test.  
74 We found no significant differences in any measures of offspring compulsivity based on offspring sex or CBD  
75 exposure ( $46.14 \pm 7.06$  marbles buried N=14 vehicle-exposed females,  $34.04 \pm 3.63$  marbles buried N=26 CBD-  
76 exposed females,  $P=0.098$ , t-test,  $39.91 \pm 4.40$  marbles buried N=22 vehicle-exposed male,  $42.09 \pm 5.23$  marbles  
77 buried N=23 CBD-exposed males,  $P=0.751$ , t-test). Additional measures from the marble burying test showed  
78 that fetal CBD exposure does not affect compulsivity (Supplemental Table 1).

### 79 80 **Fetal CBD exposure does not alter offspring spatial memory**

81 To determine how fetal CBD exposure impacts offspring spatial memory, we conducted the Y maze test. We  
82 found no effect of CBD exposure, sex, or genotype (WT or *TRPV1*<sup>KO/KO</sup>) on spatial memory in the percent of  
83



93 correct alternations within the Y maze (Figure 3A/B,  $0.656 \pm 0.020$  percent correct alternations N=13 vehicle  
94 females,  $0.68 \pm 0.025$  percent correct alternations N=21 CBD females,  $P=0.63$ , t-test.  $0.70 \pm 0.021$  percent correct  
95 alternations N=23 vehicle males, and  $0.69 \pm 0.027$  percent correct alternations N=21 CBD males,  $P=0.699$ , t-  
96 test).

### 98 **Fetal CBD exposure decreases cognition in female offspring**

99 CBD can activate 5HT<sub>1A</sub> receptors and Kv7 potassium channels. Fetal overactivation of serotonin receptors can  
10 negatively impact offspring cognition<sup>20</sup>. During fetal development, serotonin receptors are highly expressed in  
11 the prefrontal cortex (PFC), a region of the brain that mediates cognition<sup>34</sup>. Fetal overactivation of Kv7.2 and  
12 Kv7.3 is associated with intellectual disabilities, decreases in memory, and behavioral deficits<sup>26</sup>. To determine if  
13 fetal CBD exposure impacts offspring cognition, we conducted the puzzle box test. This test introduces each  
14 mouse to a light box and presents a progressively harder cognitive challenge to reach a dark goal area. Each mouse  
15 completes 9 trials, with novel progressive challenges at trials 2, 5, and 8. Mice with sufficient cognitive skills  
16 decrease their time to the goal area after secondary exposure to the obstacle. Male CBD-exposed offspring reached  
17 the goal box at all trials at similar times compared to vehicle-exposed male offspring (Figure 3L). Female CBD-  
18 exposed offspring took significantly more time to reach the goal area in trial 9 compared to the vehicle-exposed  
19 female offspring ( $71.75 \pm 20.71$  seconds vehicle-exposed females,  $139.42 \pm 26.91$  seconds CBD-exposed females,  
20 N=12 each,  $P=0.02$ , Wilcoxon rank sum test), Figure 3K. These data show that fetal CBD exposure impairs  
21 cognition in female mice.

### 13 **Fetal CBD exposure decreases excitability of PFC L2/3 pyramidal neurons in a sex-dependent manner**

14 We explored neural mechanisms that transduce fetal CBD exposure into decreased cognition in female mice (Fig.  
15 3) with *ex vivo* electrophysiological recordings. We measured the intrinsic membrane properties of layer 2/3  
16 pyramidal neurons in acute PFC slices from the CBD and vehicle-exposed male and female offspring. Fetal CBD-

17 exposed female mice showed significantly decreased excitability (treatment effect,  $p < 0.0001$ , two-way ANOVA),  
18 while CBD-exposed male pups were comparable to sex-matched vehicle treated controls (treatment effect,  
19  $p = 0.1711$ , two-way ANOVA; Fig. 4. 2A-C). Overall, fetal CBD exposure did not change the spike threshold  
20 (Vehicle:  $-39.84 \pm 2.613$  mV; CBD:  $-35.92 \pm 1.523$  mV;  $p = 0.2018$ ) (Fig. 4D). However, we observed a significant  
21 increase in both membrane potentials (Vehicle:  $24.23 \pm 2.251$  mV; CBD:  $33.21 \pm 1.963$  mV;  $p = 0.0043$ ) and  
22 minimum currents required to trigger action potentials (Vehicle:  $110 \pm 9.574$  pA; CBD:  $162.5 \pm 11.36$ ;  $p = 0.0007$ )  
23 in CBD-exposed mice (Fig. 4D). We found that these differences stem from alterations in the intrinsic properties  
24 of female (Fig. 4F), but not male (Fig. 4H), offspring, without affecting resting membrane potentials (Vehicle: -  
25  $64.07 \pm 2.008$  mV; CBD:  $-68.06 \pm 1.773$  mV;  $p = 0.1261$ ) (Fig. 4E, G, and I). Together, these data demonstrate  
26 CBD-mediated and sex-dependent decrease in neuronal excitability of PFC layer 2/3 pyramidal neurons.

### 28 **Fetal CBD exposure affects excitatory synapse development in the PFC in a sex dependent manner**

29 We next investigated whether fetal CBD exposure leads to sex-dependent structural and functional changes of  
30 excitatory spine synapses on layer 2/3 pyramidal neurons in the PFC because excitatory synapse development is  
31 regulated by neuronal activity<sup>35,36,37</sup>. We examined spine density (Fig. 5A and B) and function (Fig. 5A and D) in  
32 acute PFC slices of CBD and vehicle-exposed mice using two-photon microscopy and simultaneous whole-cell  
33 patch clamp recordings and two-photon glutamate uncaging<sup>38</sup>. We found that neither spine density (Vehicle:  $0.91$   
34  $\pm 0.04$  #/ $\mu\text{m}$ ; CBD:  $0.85 \pm 0.04$  #/ $\mu\text{m}$ ;  $p = 0.2513$ ) nor size (Vehicle:  $111.4 \pm 8.07$ ; CBD:  $123.7 \pm 6.76$ ;  $p = 0.2479$ )  
35 were affected by fetal CBD exposure (Fig. 5C). No sex-dependent changes were observed (Female, Vehicle:  $0.90$   
36  $\pm 0.06$  #/ $\mu\text{m}$ , CBD:  $0.79 \pm 0.07$  #/ $\mu\text{m}$ ,  $p = 0.2813$ ; Male, Vehicle:  $0.906 \pm 0.03$  #/ $\mu\text{m}$ ; CBD:  $0.907 \pm 0.02$  #/ $\mu\text{m}$ ;  
37  $p = 0.9750$ ) (Fig. 5F and I). Surprisingly, however, uncaging-evoked alpha-amino 3-hydroxy-5-methyl-4 isoxazole  
38 propionic acid receptor (AMPA) currents (uEPSCs) were significantly decreased on CBD-exposed groups (Fig.  
39 5D and E) compared to vehicle treated controls (Vehicle:  $7.49 \pm 0.42$  pA ; CBD:  $6.09 \pm 0.33$  pA;  $p = 0.011$ ). We  
40 found this effect was female specific. uEPSCs were significantly smaller in fetal CBD-exposed female offspring

41 (Vehicle:  $8.66 \pm 0.55$  pA; CBD:  $5.89 \pm 0.51$ ;  $p=0.0009$ ) (Fig. 5G and H) with no effect on uEPSC amplitudes  
42 from CBD male mice (Vehicle:  $6.48 \pm 0.56$  pA; CBD:  $6.24 \pm 0.45$  pA;  $p=0.898$ ) (Fig. 5J and K). Note that we  
43 targeted similar sizes of spines across groups as spine size and synaptic strength are strongly correlated<sup>38</sup>. These  
44 data show the female-specific effect of fetal CBD exposure on excitatory synapse development in the PFC.

## 46 Discussion

47 CBD is easily accessible in many countries, and helps with nausea, the most common adverse symptom of  
48 pregnancy. The data presented here demonstrate that fetal CBD exposure sensitizes male offspring to thermal  
49 pain, decreases female offspring cognition, and reduces excitability of prefrontal cortical pyramidal neurons from  
50 female offspring. These results show CBD consumption during pregnancy can adversely affect fetal  
51 neurodevelopment. The data presented here are urgently needed to inform public health messaging.

### 53 Fetal CBD exposure induces thermal pain sensitivity in male offspring

54 Our data demonstrate intrauterine CBD exposure increases thermal pain sensitivity in 11-week-old male  
55 offspring. CBD metabolites are not detected in pups after P8 suggesting that fetal CBD exposure alters thermal  
56 pain sensing circuits during development. This effect was dependent on the TRPV1 receptor. TRPV1 receptors  
57 are activated by high heat ( $40-45^{\circ}\text{C}$ ,  $104-113^{\circ}\text{F}$ )<sup>39</sup> and are bound and activated by CBD<sup>31</sup>. TRPV1 overactivation  
58 by heat is hypothesized to be the mechanism that confers the detrimental fetal developmental effects of maternal  
59 fever, such as neural tube defects<sup>11</sup>. In a developmental context, altering the development of thermal pain circuits  
60 has critical postnatal implications. Persistent increased thermal pain sensitivity could increase the offspring's  
61 susceptibility to chronic pain and could lay the ground for the use or dependency on pain relieving medications  
62 like opioids.

54 CBD-exposed female offspring responded to thermal stimuli similarly to vehicle-exposed controls.  $17\beta$ -estradiol  
55 activation can downregulate TRPV1 activity in dorsal root ganglion sensory neurons<sup>40</sup> and female mice show  
56 different thermal pain sensitivity across the estrus cycle<sup>41</sup>. Thus, it is possible that estrogen could protect female  
57 offspring from excessive activation of TRPV1 by intrauterine exposure to CBD.

58  
59 Our data show that fetal CBD exposure increases thermal pain sensitivity in adult wild type male mice.  
60 Intrauterine CBD exposure reduced the latency to response in wild type male offspring compared to vehicle-  
61 exposed controls in the Hargreaves test. The Hargreaves test measures warm temperatures starting at 25°C/77°F  
62 with an increasingly hot light shined at the hind paw. CBD binds and activates TRPV1 and TRPV2<sup>42</sup>. While  
63 TRPV1 is activated by temperatures ranging from 40-45°C, 104-113°F, TRPV2 is activated by temperatures  
64 ranging from 50–53°C, 122-127.4°F<sup>39</sup>. *TRPV1<sup>KO/KO</sup>* mice have similar thermal sensitivity to wild type mice when  
65 measured using the Hargreaves test here and in previously published studies, but thermal sensitivity of  
66 *TRPV1<sup>KO/KO</sup>* mice can be distinguished from wild type with the 50°C/122°F hot plate<sup>43</sup>. Intrauterine CBD  
67 exposure does not impact thermal sensitivity in *TRPV1<sup>KO/KO</sup>* mice, suggesting that the effect of CBD on thermal  
68 pain circuit development depends on TRPV1. These results suggest that excessive activation of TRPV1 during  
69 fetal development can alter long term thermal sensitivity.

### 31 **Fetal CBD exposure does not impact offspring anxiety or compulsivity**

32 The prefrontal cortex is a region of the brain that controls cognition, memory, anxiety, attention, and impulsivity<sup>44</sup>.  
33 The developing prefrontal cortex contains a multitude of receptors critical for normal development, including  
34 5HT<sub>1A</sub> serotonin receptors and Kv7 receptors that are bound and activated by CBD<sup>45,46</sup>. We investigated multiple  
35 behaviors mediated by the prefrontal cortex, including anxiety and compulsivity. CBD-activated receptors,  
36 including TRPV1, are expressed in the hippocampus, a region of the brain that mediates memory<sup>13</sup>.

88 We found that intrauterine CBD exposure did not impact offspring anxiety in wild type or *TRPV1<sup>KO/KO</sup>* mice by  
89 any measure in the open field test, the light dark box, or the elevated zero maze test. Previous studies administered  
90 20mg/kg CBD (Epidiolex) dissolved in honey via oral gavage from 14 days pre-conception through offspring  
91 weaning and found that the 12-week-old CBD-exposed female offspring buried more marbles in the marble  
92 burying test while male CBD-exposed offspring were no different than control<sup>47</sup>. In contrast, we found that oral  
93 gavage of 50mg/kg CBD from E5 through birth did not significantly affect anxiety measured by the open field,  
94 light/dark box, or elevated zero maze, nor any measures of compulsivity on the marble burying test.

### 96 **Fetal CBD exposure decreases cognition in female offspring, but not male offspring**

97 We show fetal CBD exposure reduces cognition in female offspring. Cognition is mediated by the prefrontal  
98 cortex<sup>44</sup>. We show that fetal CBD exposure reduces excitability of P14-P21 pyramidal neurons from the female  
99 prefrontal cortex. Fetal CBD exposure raised the required current to elicit an action potential, raised the required  
100 mV to elicit an action potential, and decreased the number of action potentials elicited at set current.

101  
102 The electrophysiological and cognitive effects of fetal CBD exposure could be mediated by excessive activation  
103 of two different ion channel receptors. CBD activates 5HT<sub>1A</sub> and Kv7.2/3, both of which mediate neuronal  
104 activity<sup>8,10</sup> and are expressed in the fetal prefrontal cortex<sup>45,29</sup> (Figure 6A). When 5HT<sub>1A</sub> is excessively activated  
105 during development, offspring show decreased neurogenesis, decreased neuronal activity in corticotropin  
106 releasing neurons, decreased neuron network complexity, changes in neuronal refinement, decreases in the  
107 amplitude of sensory-evoked potentials, a delay in sensory evoked potentials, and decreased sensory and  
108 spontaneously evoked firing<sup>20</sup>. There is evidence that Kv7 channels also regulate neuronal activity. For example,  
109 Kv7.2/3 gain of function mutations are associated with epilepsy and intellectual disability in humans<sup>26</sup>. Excessive  
110 activation of Kv7.2/3 decreases the refractory period following action potentials and increases post-conditioned  
111 super excitability of neurons<sup>48,49</sup>. Because fetal CBD exposure impacts neuronal excitability and cognition and

12 activates 5HT<sub>1A</sub> and Kv7.2/3, which mediate neuronal development and excitability, excessive activation of  
13 5HT<sub>1A</sub> and Kv7.2/3 could be a mechanism by which CBD alters cognition. In contrast, fetal CBD exposure does  
14 not alter resting membrane potential, which is not set by 5HT<sub>1A</sub> nor Kv7.2/3. The extent to which excessive  
15 activation of 5HT<sub>1A</sub> and Kv7.2/3 contribute to cognitive and cellular effects of intrauterine CBD exposure on  
16 female mice will be an avenue of future studies.

17  
18 CBD may alter female cognition through its effect on serotonin production (Figure 6B). CBD activates catabolism  
19 of tryptophan, a precursor of serotonin, which could deplete endogenous serotonin. Reduction of serotonin levels  
20 can reduce cognitive function and alter neuronal excitability in mice<sup>50,51</sup>. Tryptophan depletion impairs memory  
21 consolidation in humans<sup>21</sup> and hinders cognitive function in patients with Alzheimer disease<sup>52</sup>. In rats, tryptophan  
22 depletion impairs object recognition<sup>53</sup>. Genetic deletion of tryptophan hydroxylase 2 (TPH2), the enzyme that  
23 converts tryptophan to serotonin, impairs learning and cognitive flexibility in mice<sup>22</sup>.

24  
25 The sex specific effects of CBD on neuronal excitability and cognition may be due to one or multiple intertwined  
26 pathways. Female mice have higher levels of circulating 5HT than do males, and higher expression of 5HT<sub>1A</sub>  
27 <sup>54,55,56</sup>. CBD may reduce circulating levels of estrogen because CBD inhibits aromatase, the enzyme that converts  
28 androgens to estrogens<sup>57</sup> (Figure 6C). Aromatase inhibition increases male cognition in mice<sup>58</sup> and humans with  
29 aromatase polymorphisms have increased risks of age-related cognitive decline<sup>59</sup>. In clinical studies, reduction of  
30 estrogen levels is associated with decreased female cognition, learning, and memory<sup>60</sup>. Decreases in circulating  
31 estrogens also mediates offspring neurodevelopment and behavior<sup>61</sup>. Reduction of estrogen levels decreases  
32 neuronal survival, differentiation, and plasticity, and downregulates the cholinergic and glutamate systems in  
33 mice and nonhuman primates<sup>62,60</sup>. Thus, one potential mechanism by which fetal CBD exposure elicits its effects  
34 on cognition could be through reduction of circulating estrogens which mediate cognition in female mice.

35 Mechanisms by which intrauterine CBD exposure impacts cognition and thermal sensitivity in a sex specific  
36 manner will be exciting new avenues for future studies.

37  
38 Cannabis consumption during pregnancy is increasing<sup>2</sup>. Pregnant patients can self-medicate nausea symptoms  
39 with whole cannabis or CBD alone. Clinical studies show fetal cannabis exposure is associated with adverse  
40 behavioral outcomes<sup>63</sup>. Most cannabis products contain CBD. There is likely an additional population of pregnant  
41 people who consume CBD alone because it is not psychoactive. There is a gap in understanding the effect of  
42 gestational CBD consumption, despite high consumption rates. Our work shows that a high dose fetal CBD  
43 exposure increases male thermal pain sensitivity, reduces excitability of pyramidal neurons in the prefrontal  
44 cortex in female mice, and decreases female cognition. This research is urgently needed to inform public health  
45 messaging that CBD consumption during pregnancy can have adverse long-term neurodevelopmental outcomes.

46  
47 The data presented here show fetal CBD exposure poses risks to offspring neurodevelopment and behavior. CBD  
48 exposure increased thermal pain sensitivity for male offspring and reduced cognition in female offspring. CBD  
49 exposure reduced excitability of the prefrontal cortex. We show that CBD exposure alone cannot account for  
50 some of the human behavioral outcomes associated with gestational cannabis exposure including anxiety,  
51 compulsivity, and spatial memory. This data fills a critical gap in the translational research focused on gestational  
52 cannabis consumption. Clinical work cannot distinguish between cannabis component parts. As CBD gains  
53 traction as a remedy for morning sickness, it is critical that we reveal the effects of gestational CBD exposure.  
54 This work should be used in the clinical sphere to caution pregnant people against CBD consumption during  
55 pregnancy. Further research to determine critical periods of CBD exposure and mechanisms of action are urgently  
56 needed to inform public health messaging and clinical practice.

57  
58 **Methods**

59

## 60 **Study design**

61 C57Bl6J female mice were administered 50mg/kg of CBD (NIDA) dissolved in sunflower oil or sunflower oil  
62 alone by oral gavage from E5 through birth. Researchers were blinded through the entirety of behavioral testing  
63 as to which group was CBD-exposed and which was control. At 21 days old, offspring were weaned into standard  
64 chow, and cohoused with their same-sex siblings. Our sample size includes 27 vehicle-exposed and 27 CBD-  
65 exposed dams, whose litter sizes vary (Figure 1). All experiments were approved by the University of Colorado  
66 Anschutz Medical Campus Institutional Animal Care and Use Committee. Each behavior experiment was  
67 performed once per animal, within a two-week period to accommodate high volumes of offspring. Both exposure  
68 groups were represented in each individual trial. The objectives of our study are to understand the effect of fetal  
69 CBD exposure on offspring thermal pain sensitivity, anxiety, spatial memory, compulsivity, cognition, and  
70 prefrontal cortex excitability.

71

## 72 **Animal protocols**

73 These experiments were approved by the University of Colorado Anschutz Medical Campus Institutional Animal  
74 Care and Use Committee (protocol #139). Female C57BL6 mice (Strain #000664) and female *TRPV1<sup>KO/KO</sup>* mice  
75 (Strain #003770) on a C57BL6 background (Jackson Laboratory, Maine) Females were individually housed  
76 mated with a single male. Upon visualization of a vaginal plug (E0.5), the male mouse was removed. Dam weight  
77 was tracked each day starting on E0.5. Any mouse that had not gained appropriate weight by E14 was removed  
78 from the study.

79

## 80 **CBD administration**

81 Cannabidiol (CBD) (98.7% pure powder, synthetic, National Institutes of Drugs of Abuse) was obtained  
82 following approval of our Drug Enforcement Administration (DEA) Schedule 1 Drug license. 500mg of CBD



83 was diluted in 40 ml sunflower oil and heated to 60°C to make a 12.5 mg/ml concentration in an amber glass vial  
84 to avoid light exposure. A second identical vial was filled with equal volume of sunflower oil. Vials were labeled  
85 drug “A” and “B” by author E.A. Bates to allow author K.S. Swenson to remain blinded for the duration of  
86 behavior experiments. Diluted CBD was evaluated for purity by the iC42 lab at the University of Colorado  
87 Anschutz Medical Campus. Consumption method (injection, oral consumption, inhalation) affects  
88 pharmacokinetic CBD breakdown. CBD is most commonly consumed topically (lotions, balms) or orally<sup>30</sup>. Oral  
89 consumption of CBD has a slower pharmacodynamic clearance than with IP injection<sup>64</sup>. CYP3A4 metabolizes  
90 CBD into the primary active metabolite 7-OH-CBD. CBD is metabolized by CYP3A4 to the primary active  
91 metabolite of 7-OH-CBD. This first pass metabolism reduces the bioavailability of CBD to 10-13% of the initial  
92 dose<sup>65</sup>. We chose to multiply the standard research dose (5mg/kg administered as i.p. injection) by 10 to create a  
93 comparable oral dose of 50mg CBD/kg body weight. This dose is well below the dose that would induce  
94 hepatotoxicity when administered via oral gavage repeatedly over multiple days<sup>66</sup>. CBD is highly lipophilic and  
95 easily crosses the placenta into the fetal blood stream, where it accumulates in fat-heavy organs such as the brain  
96 and liver<sup>6</sup>.

97  
98 Data collected on the dams included daily weighing, gestational length, litter size, and pup vitality. We calculated  
99 an estimated average pup weight (last pregnant day weight – pre-pregnancy weight) / litter size) for each dam.  
100 All data points were analyzed for sex differences whenever possible. Unblinding to exposure group occurred after  
101 all analyses were completed.

### 102 103 **Plasma metabolite concentration**

104 On E18.5, dams were euthanized via isoflurane inhalation and secondary cervical dislocation. The uterus was  
105 removed, opened, and pups were separated from the uterus. Pups were removed from their placentas, decapitated,  
106 and blood was collected into EDTA tubes. P4, P8, and P12 pups were euthanized, and blood collected into EDTA

tubes. Dam blood was collected via decapitation or cardiac puncture and blood was stored in EDTA tubes (Microvette 100 KE3 Kent Scientific Corporation, item ID: MCVT100-EDTA). Blood was stored on ice and centrifuged at 4°C at 3000xg for 10 minutes to separate plasma. Plasma was stored in a clean EDTA tube at -80°C until transfer to the iC42 Clinical Research and Development (Aurora, CO). CBD, 6a-hydroxy-CBD, 7-hydroxy-CBD, carboxy-CBD, and CBD glucuronide were quantified using high-performance liquid chromatography-tandem mass spectrometry (LC-MS/MS) as previously described<sup>67</sup>. The results included in the study sample batch met predefined acceptance criteria: the calibration range for 6a-hydroxy-CBD, 7-hydroxy-CBD and carboxy-CBD are 1.56-400 ng/mL, CBD range was 0.39-400ng/ml, and CBD-glucuronide range was 0.78-200ng/ml. There was no carryover and no matrix interferences. Accuracy in the study sample batch was within the ±15% acceptance criterion and imprecision was <15%.

## **Behavior**

All behavior protocols were obtained from the University of Colorado Anschutz Medical Campus Animal Behavior Core staff. These tests occurred in controlled light, temperature, humidity, silent, pathogen-free environment. Unless otherwise noted, behavioral tests were completed between 9AM and 1PM. All mice were tested following schedule: open field test at 6 weeks of age, y maze test at 7 weeks of age, light dark box test at 8 weeks of age, puzzle box test for cognition at 9 weeks of age, elevated zero maze test for anxiety at 10 weeks of age, marble burying for compulsivity at 13 weeks of age, and Hargreaves for thermal pain sensitivity at 11 weeks of age. Open field, light/dark box, elevated zero maze, and puzzle box data were collected and analyzed using the Ethovision XT software from Noldus using version 8.5. Before and after every mouse, any behavior equipment was wiped to remove soiling followed by 70% ethanol wiping. In any experiments involving multiple chambers which run multiple mice at a time, individual chambers were used sequentially for every mouse from one cage before being replaced with sex-matched mice from another cage to reduce any stress due to lingering scents.

31

## 32 **Hargreaves test**

33 The Hargreaves test is a commonly used method to test murine temperature sensitivity. We placed each mouse in  
34 a glass bottom enclosure heated to 30°C/86°F temperature to minimize errors arising from heat sink effects. Mice  
35 were habituated to the apparatus for 1 hour the day before the test, and at least 30 minutes before any testing  
36 began. Once the mouse was standing still in the enclosure, we applied an infrared heat source under the plantar  
37 surface of the hind paw and quantified the latency to response to a heat source. The intensity of the heat source  
38 was set to 10 amps which produced withdraw latencies of 5-15 seconds in naïve animals, which allows enough  
39 time for heat detection and response but is short enough to not cause thermal damage. We tested eighteen CBD-  
40 exposed and twenty-one vehicle exposed female mice from seven different litters per exposure and eight CBD-  
41 exposed and nine vehicle exposed male mice from three different litters per exposure.

42

## 43 **Estrus Cycle Tracking**

44 The vaginal cytology method was used to track the estrus cycle of female mice<sup>68</sup>. Immediately after the  
45 Hargreaves test, female mice were lavaged to collect cells from the vaginal wall. PBS was pipetted up and down  
46 3 times within the vagina to obtain cells. Cells were mounted on a dry slide, overlaid with a coverslip, and  
47 immediately viewed at 200X magnification under bright field illumination. Estrus stage was determined based on  
48 the presence or absence of leukocytes, cornified epithelial, and nucleated epithelial cells<sup>69</sup>.

49

## 50 **Open Field Test**

51 The open field test measures murine anxiety and locomotor activity. We place the mice in a 44Wx44Lx25H cm  
52 arena under bright lighting conditions (900-1000lux) for 10-minute sessions each. Ethovision tracking system  
53 measures total distance traveled in centimeters along with time spent in the outer and central zones of the box.

54 We tested 14 vehicle-exposed female offspring from 5 litters, 25 CBD-exposed female offspring from 7 litters,  
55 18 vehicle-exposed males from 6 litters, and 21 CBD-exposed males from 7 litters in the Open Field Test.

### 57 **Light Dark Box**

58 The light dark box tests murine unconditioned anxiety. The mice were placed in a box (45WX22.5LX28H cm)  
59 with one dark, covered section and one lit, open section, separated with a dark wall containing a door. Each mouse  
60 was placed into the closed section of the box for 5 minutes, then the door was removed, and the mouse was able  
61 to explore the open area under video monitoring for 5 minutes. We quantified time spent in the open and closed  
62 areas, and number of transitions between the two areas. We tested six vehicle-exposed female offspring from  
63 three litters, nineteen CBD-exposed females from five litters, thirteen vehicle-exposed male offspring from four  
64 litters, and twenty-two CBD-exposed male offspring from six litters in the light/dark box.

### 56 **Elevated Zero Maze**

57 The elevated zero maze tests murine anxiety. Mice were placed individually on a circular runway (50cm diameter,  
58 5cm wide track, 50cm above ground) which is divided into four 90° quadrants. Two opposing quadrants are  
59 surrounded by 30cm high walls while the in-between quadrants have no walls. The mice were placed facing the  
60 entrance of one of the walled quadrants. Time spent in each quadrant was video recorded and scored for the  
61 number of zone transitions, distance moved, and percentage of time in open and closed zones. Each mouse is  
62 tested for ten minutes. We tested thirteen vehicle-exposed female offspring from five litters, twenty-five CBD-  
63 exposed female offspring from seven litters, twenty-three vehicle-exposed male offspring from seven litters, and  
64 twenty-six CBD-exposed male offspring from seven litters in the elevated zero maze.

### 76 **Y Maze Test**

77 The y maze spontaneous alternation test quantifies murine spatial cognition. Mice were placed in the center of a  
78 y-shaped maze with three opaque arms at 120° angles from each other. The mouse was free to explore all three  
79 arms of the maze. Mice were monitored for either 10 minutes or 22 arm-changes, or whichever happened first.  
80 We calculate the percentage of “correct” and “incorrect” movements, where correct patterns are three subsequent  
81 arm changes (e.g., arm A to arm B to arm C) and incorrect patterns are three arm changes in repeated arms (e.g.,  
82 arm A to arm B to arm A). Entry to the arm is marked once all four limbs have entered that arm. We tested thirteen  
83 vehicle-exposed female offspring from five litters, twenty-one CBD-exposed female offspring from seven litters,  
84 twenty-three vehicle-exposed male offspring from seven litters, and twenty-one CBD-exposed male offspring  
85 from seven litters in the Y Maze.

### 86

### 87 **Marble Burying Test**

88 Marble burying measures compulsivity in mice. Our apparatus is an 11cmX11cm box filled with a layer of  
89 bedding and a 3X3 square of evenly placed blue marbles on top of the bedding under recording on the Ethovision  
90 video monitoring system. Mice were placed in the apparatus for 10 minutes. We quantified the total distance  
91 traveled and velocity of the mice from the Ethovision tracking system, and marble burying was quantified  
92 manually. We quantified the number of marbles buried, number of marbles re-buried, and time spent burying  
93 (seconds and percentage of total time). Apparatuses were reset between each mouse from the same cage, through  
94 between mice from separate cages we removed the marbles and bedding, cleaned the boxes and marbles with  
95 70% ethanol, and replaced the setup with fresh bedding. When possible, littermate sex-matched mice were tested  
96 in the same box to reduce stress caused by any latent smells. We tested fourteen vehicle-exposed female offspring  
97 from five litters, twenty-six CBD-exposed female offspring from seven litters, twenty-two vehicle-exposed male  
98 offspring from seven litters, and twenty-three CBD-exposed male offspring from seven litters.

### 99

### 00 **Puzzle box**

01 The puzzle box measures murine cognition. The puzzle box is a Plexiglas white box divided by a removable  
02 barrier into two compartments: a brightly lit start zone (58 cm long, 28 cm wide) and a smaller covered goal zone  
03 (15 cm long, 28 cm wide). Mice are motivated to move into the goal zone by their aversion to the bright light in  
04 the start zone. We placed individual mice into the start zone and measured the time to move through the 4cm wide  
05 underpass to the goal zone (dark compartment). Each mouse underwent nine trials (T1-T9) over the course of  
06 three days, with three trials each day. Each day the underpass was obstructed with increasing difficulty. For T1  
07 (training) the underpass is clear, and the barrier has an open door over the location. On T2 and T3 (day 1) and T4  
08 (day 2), the mice go through an underpass. On T5 and T6 (day 2) and T7 (day 3), the mice must dig through the  
09 sawdust-filled underpass to reach the goal zone. During T8 and T9 (day 3), the mice must remove a 4x4cm  
10 covering and then dig through sawdust to reach the goal zone. This sequence allows assessment of problem-  
11 solving abilities (T2, T5 and T8), learning/short-term memory (T3, T6, and T9), and repetition on the next day  
12 provides a measure of long-term memory (T4 and T7). We tested twelve vehicle-exposed female offspring from  
13 five litters, twelve CBD-exposed female offspring from five litters, twelve vehicle-exposed male offspring from  
14 four litters, and twelve CBD-exposed male offspring from four litters in the puzzle box.

### 16 **Preparation of acute prefrontal cortex (PFC) slices**

17 Acute coronal PFC slices were obtained from P14 to 22 C57BL/6 male and female wild-type mice prenatally  
18 exposed to either CBD or vehicle in accordance with the Institutional Animal Care and Use Committees of the  
19 University of Colorado on Anschutz Medical Campus and National Institutes of Health guidelines. Mice were  
20 anesthetized with isoflurane and euthanized by decapitation. Immediately after decapitation, the brain was  
21 extracted and placed in icy cutting solution containing 215mM sucrose, 20mM glucose, 26mM NaHCO<sub>3</sub>, 4mM  
22 MgCl<sub>2</sub>, 4mM MgSO<sub>4</sub>, 1.6mM NaH<sub>2</sub>PO<sub>4</sub>, 1mM CaCl<sub>2</sub>, and 2.5mM KCl. Using a Leica VT1000S vibratome, the  
23 PFC was sectioned into 300µm thick slices. PFC slices were incubated at 32°C for 30 minutes in 50% cutting  
24 solution and 50% artificial cerebrospinal fluid (ACSF) composed of 124mM NaCl, 26mM NaHCO<sub>3</sub>, 10mM

25 glucose, 2.5mM KCl, 1mM NaH<sub>2</sub>PO<sub>4</sub>, 2.5mM CaCl<sub>2</sub>, and 1.3mM MgSO<sub>4</sub>. After 30 minutes, this solution was  
26 replaced with ACSF at room temperature. For all two-photon and electrophysiology experiments, the slices were  
27 placed in a recording chamber and bathed in carbogenated (95% O<sub>2</sub> / 5% CO<sub>2</sub>) ACSF at 30°C and allowed to  
28 equilibrate for at least 30 minutes prior to the start of experiments.

## 30 **Two-photon Imaging**

31 Two-photon imaging was performed on layer 2/3 pyramidal neurons at depths of 20-50 μm of PFC slices at P14-  
32 P22 using a two-photon microscope (Bruker) with a pulsed Ti:sapphire laser (MaiTai HP, Spectra Physics) tuned  
33 to 920 nm (4-5 mW at the sample). All experiments were controlled using the Prairie View (Bruker) software.  
34 Neurons were imaged at 30°C in recirculating ACSF with 2mM CaCl<sub>2</sub>, 1mM MgCl<sub>2</sub> aerated with 95% O<sub>2</sub> / 5%  
35 CO<sub>2</sub>. For visualization, cells were whole-cell patched and filled with Alexa 488. For each neuron, image stacks  
36 (512 x 512 pixel; 0.047 μm/pixel) with 1-μm z-steps were collected from secondary or tertiary distal apical  
37 dendrites. All images shown are maximal projections of three-dimensional image stacks after applying a median  
38 filter (2 x 2) to the raw image data. All protrusions on the dendritic shaft were counted as dendritic spines in  
39 images of green (Alexa 488) channel using ImageJ software (NIH). Dendritic spines density was calculated by  
40 dividing the number of spines by the dendritic length (in μm). Spine size was estimated from background-  
41 subtracted and bleed-through-corrected integrated pixel fluorescence intensity of the region of interest (~1μm<sup>2</sup>)  
42 surrounding the spine head. This measurement was normalized to the mean fluorescence intensity of the dendritic  
43 segment adjacent to the dendritic spine of interest<sup>35,70</sup>.

## 45 **Electrophysiology and Two-photon glutamate uncaging**

46 PFC layer 2/3 pyramidal neurons were identified by morphology and distance from slice surface (< 40μm), and  
47 patched in the whole-cell (4-8 MΩ electrode resistance; 20-40 MΩ series resistance) current clamp configuration  
48 (MultiClamp 700B, Molecular Devices). Using a potassium-based internal solution (136mM K-gluconate, 10mM

49 HEPES, 17.5mM KCl, 9mM NaCl, 1mM MgCl<sub>2</sub>, 4mM Na<sub>2</sub>-ATP, 0.4mM Na-GTP, 0.2mM Alexa 488, and ~300  
50 mOsm, ~pH 7.26), spiking properties of layer 2/3 neurons were examined at 30°C in recirculating ACSF with  
51 2mM CaCl<sub>2</sub>, 1mM MgCl<sub>2</sub>. Excitability was measured by injection of depolarizing current steps (50 - 250pA,  
52 300ms). Resting membrane potential was recorded prior to the first depolarizing current step. Minimum current  
53 required to elicit an action potential was defined as the smallest current step that triggered at least one spike. The  
54 spike threshold was defined as the potential at which the spike is triggered. The change in potential ( $\Delta V_m$ ) was  
55 defined as the difference (absolute value) between the resting membrane potential and spike threshold. For two-  
56 photon glutamate uncaging experiments, whole-cell recordings in the voltage clamp configuration ( $V_{hold} = -$   
57 65mV) were performed in 1 $\mu$ M TTX and 2.5mM MNI-glutamate (Tocris) containing ACSF at 30°C. Using  
58 cesium-based internal solution (135mM Cs-methanesulfonate, 10mM HEPES, 10mM Na<sub>2</sub> phosphocreatine, 4mM  
59 MgCl<sub>2</sub>, 4mM Na<sub>2</sub>-ATP, 0.4mM Na-GTP, 3mM Na L-ascorbate, 0.2mM Alexa 488, and ~300 mOsm, ~pH 7.25),  
60 individual dendritic spines (on secondary or tertiary apical dendritic branches, 50-100 $\mu$ m from soma) were  
61 targeted by glutamate uncaging and uncaging evoked excitatory postsynaptic currents (uEPSCs) were recorded<sup>35</sup>.  
62 uEPSC amplitudes were quantified as the average (5-10 test pulses at 0.1 Hz) from a 1 ms window centered on  
63 the maximum current amplitude within 30 ms after uncaging pulse delivery.

## 65 **Statistical Analyses**

66 Unless otherwise specified, all data were collected and segregated by sex, exposure group, and genotype. We first  
67 completed a D'Agostino and Pearson test to determine if data were normally or nonnormally distributed. When  
68 normally distributed, data within each direct comparison (two exposure groups within one sex and one genotype)  
69 were analyzed via a t test, and any with a p-value less than 0.05 is reported as significant. If data were nonnormally  
70 distributed, we completed a Wilcoxon rank sum test for data within each direct comparison and reported any  
71 significant data with a p value less than 0.05.



## 73 References

- 74 (1) Wibowo, N.; Purwosunu, Y.; Sekizawa, A.; Farina, A.; Tambunan, V.; Bardosono, S. Vitamin B<sub>6</sub>  
75 Supplementation in Pregnant Women with Nausea and Vomiting. *Int J Gynaecol Obstet* **2012**, *116* (3),  
76 206–210. <https://doi.org/10.1016/j.ijgo.2011.09.030>.
- 77 (2) Volkow, N. D.; Han, B.; Compton, W. M.; McCance-Katz, E. F. Self-Reported Medical and Nonmedical  
78 Cannabis Use Among Pregnant Women in the United States. *JAMA* **2019**, *322* (2), 167.  
79 <https://doi.org/10.1001/jama.2019.7982>.
- 80 (3) Metz, T. D.; Silver, R. M.; McMillin, G. A.; Allshouse, A. A.; Jensen, T. L.; Mansfield, C.; Heard, K.; Kinney, G.  
81 L.; Wymore, E.; Binswanger, I. A. Prenatal Marijuana Use by Self-Report and Umbilical Cord Sampling in a  
82 State With Marijuana Legalization. *Obstet Gynecol* **2019**, *133* (1), 98–104.  
83 <https://doi.org/10.1097/AOG.0000000000003028>.
- 84 (4) Parker, L. A.; Rock, E. M.; Limebeer, C. L. Regulation of Nausea and Vomiting by Cannabinoids. *Br J*  
85 *Pharmacol* **2011**, *163* (7), 1411–1422. <https://doi.org/10.1111/j.1476-5381.2010.01176.x>.
- 86 (5) Abernethy, A. *Hemp Production and the 2018 Farm Bill - 07/25/2019*. FDA. [https://www.fda.gov/news-](https://www.fda.gov/news-events/congressional-testimony/hemp-production-and-2018-farm-bill-07252019)  
87 [events/congressional-testimony/hemp-production-and-2018-farm-bill-07252019](https://www.fda.gov/news-events/congressional-testimony/hemp-production-and-2018-farm-bill-07252019) (accessed 2022-11-22).
- 88 (6) Ochiai, W.; Kitaoka, S.; Kawamura, T.; Hatogai, J.; Harada, S.; Iizuka, M.; Ariumi, M.; Takano, S.; Nagai, T.;  
89 Sasatsu, M.; Sugiyama, K. Maternal and Fetal Pharmacokinetic Analysis of Cannabidiol during Pregnancy in  
90 Mice. *Drug Metab Dispos* **2021**, *49* (4), 337–343. <https://doi.org/10.1124/dmd.120.000270>.
- 91 (7) Grandl, J.; Kim, S. E.; Uzzell, V.; Bursulaya, B.; Petrus, M.; Bandell, M.; Patapoutian, A. Temperature-  
92 Induced Opening of TRPV1 Ion Channel Is Stabilized by the Pore Domain. *Nat Neurosci* **2010**, *13* (6), 708–  
93 714. <https://doi.org/10.1038/nn.2552>.
- 94 (8) Martínez-Aguirre, C.; Carmona-Cruz, F.; Velasco, A. L.; Velasco, F.; Aguado-Carrillo, G.; Cuéllar-Herrera, M.;  
95 Rocha, L. Cannabidiol Acts at 5-HT<sub>1A</sub> Receptors in the Human Brain: Relevance for Treating Temporal Lobe  
96 Epilepsy. *Frontiers in Behavioral Neuroscience* **2020**, *14*.
- 97 (9) Anand, U.; Jones, B.; Korchev, Y.; Bloom, S. R.; Pacchetti, B.; Anand, P.; Sodergren, M. H. CBD Effects on  
98 TRPV1 Signaling Pathways in Cultured DRG Neurons. *J Pain Res* **2020**, *13*, 2269–2278.  
99 <https://doi.org/10.2147/JPR.S258433>.
- 100 (10) Zhang, H.-X. B.; Heckman, L.; Niday, Z.; Jo, S.; Fujita, A.; Shim, J.; Pandey, R.; Al Jandal, H.; Jayakar, S.;  
101 Barrett, L. B.; Smith, J.; Woolf, C. J.; Bean, B. P. Cannabidiol Activates Neuronal Kv7 Channels. *eLife* *11*,  
102 e73246. <https://doi.org/10.7554/eLife.73246>.
- 103 (11) Hutson, M. R.; Keyte, A. L.; Hernández-Morales, M.; Gibbs, E.; Kupchinsky, Z. A.; Argyridis, I.; Erwin, K.  
104 N.; Pegram, K.; Kneifel, M.; Rosenberg, P. B.; Matak, P.; Xie, L.; Grandl, J.; Davis, E. E.; Katsanis, N.; Liu, C.;  
105 Benner, E. J. Temperature-Activated Ion Channels in Neural Crest Cells Confer Maternal Fever-Associated  
106 Birth Defects. *Sci Signal* **2017**, *10* (500), eaal4055. <https://doi.org/10.1126/scisignal.aal4055>.
- 107 (12) Terzian, A. L. B.; Aguiar, D. C.; Guimarães, F. S.; Moreira, F. A. Modulation of Anxiety-like Behaviour by  
108 Transient Receptor Potential Vanilloid Type 1 (TRPV1) Channels Located in the Dorsolateral Periaqueductal  
109 Gray. *Eur Neuropsychopharmacol* **2009**, *19* (3), 188–195.  
110 <https://doi.org/10.1016/j.euroneuro.2008.11.004>.
- 111 (13) Hurtado-Zavala, J. I.; Ramachandran, B.; Ahmed, S.; Halder, R.; Bolleyer, C.; Awasthi, A.; Stahlberg, M.  
112 A.; Wagener, R. J.; Anderson, K.; Drenan, R. M.; Lester, H. A.; Miwa, J. M.; Staiger, J. F.; Fischer, A.; Dean, C.  
113 TRPV1 Regulates Excitatory Innervation of OLM Neurons in the Hippocampus. *Nat Commun* **2017**, *8*,  
114 15878. <https://doi.org/10.1038/ncomms15878>.

- 15 (14) Qin, N.; Neepser, M. P.; Liu, Y.; Hutchinson, T. L.; Lubin, M. L.; Flores, C. M. TRPV2 Is Activated by  
16 Cannabidiol and Mediates CGRP Release in Cultured Rat Dorsal Root Ganglion Neurons. *J Neurosci* **2008**,  
17 *28* (24), 6231–6238. <https://doi.org/10.1523/JNEUROSCI.0504-08.2008>.
- 18 (15) Rompala, G.; Nomura, Y.; Hurd, Y. L. Maternal Cannabis Use Is Associated with Suppression of Immune  
19 Gene Networks in Placenta and Increased Anxiety Phenotypes in Offspring. *Proceedings of the National*  
20 *Academy of Sciences* **2021**, *118* (47), e2106115118. <https://doi.org/10.1073/pnas.2106115118>.
- 21 (16) Cavanaugh, D. J.; Chesler, A. T.; Jackson, A. C.; Sigal, Y. M.; Yamanaka, H.; Grant, R.; O'Donnell, D.;  
22 Nicoll, R. A.; Shah, N. M.; Julius, D.; Basbaum, A. I. Trpv1 Reporter Mice Reveal Highly Restricted Brain  
23 Distribution and Functional Expression in Arteriolar Smooth Muscle Cells. *J. Neurosci.* **2011**, *31* (13), 5067–  
24 5077. <https://doi.org/10.1523/JNEUROSCI.6451-10.2011>.
- 25 (17) Mezey, É.; Tóth, Z. E.; Cortright, D. N.; Arzubi, M. K.; Krause, J. E.; Elde, R.; Guo, A.; Blumberg, P. M.;  
26 Szallasi, A. Distribution of mRNA for Vanilloid Receptor Subtype 1 (VR1), and VR1-like Immunoreactivity, in  
27 the Central Nervous System of the Rat and Human. *Proceedings of the National Academy of Sciences* **2000**,  
28 *97* (7), 3655–3660. <https://doi.org/10.1073/pnas.97.7.3655>.
- 29 (18) *The limbic system*. <https://qbi.uq.edu.au/brain/brain-anatomy/limbic-system> (accessed 2022-11-22).
- 30 (19) Bert, B.; Fink, H.; Rothe, J.; Walstab, J.; Bönisch, H. Learning and Memory in 5-HT1A-Receptor Mutant  
31 Mice. *Behavioural Brain Research* **2008**, *195* (1), 78–85. <https://doi.org/10.1016/j.bbr.2008.02.028>.
- 32 (20) Hanswijk, S. I.; Spoelder, M.; Shan, L.; Verheij, M. M. M.; Muilwijk, O. G.; Li, W.; Liu, C.; Kolk, S. M.;  
33 Homberg, J. R. Gestational Factors throughout Fetal Neurodevelopment: The Serotonin Link. *Int J Mol Sci*  
34 **2020**, *21* (16), 5850. <https://doi.org/10.3390/ijms21165850>.
- 35 (21) Riedel, W. J.; Klaassen, T.; Deutz, N. E.; van Someren, A.; van Praag, H. M. Tryptophan Depletion in  
36 Normal Volunteers Produces Selective Impairment in Memory Consolidation. *Psychopharmacology (Berl)*  
37 **1999**, *141* (4), 362–369. <https://doi.org/10.1007/s002130050845>.
- 38 (22) Del'Guidice, T.; Lemay, F.; Lemasson, M.; Lévassieur-Moreau, J.; Manta, S.; Etievant, A.; Escoffier, G.;  
39 Doré, F. Y.; Roman, F. S.; Beaulieu, J.-M. Stimulation of 5-HT<sub>2C</sub> Receptors Improves Cognitive Deficits  
40 Induced by Human Tryptophan Hydroxylase 2 Loss of Function Mutation. *Neuropsychopharmacol* **2014**, *39*  
41 (5), 1125–1134. <https://doi.org/10.1038/npp.2013.313>.
- 42 (23) Bonnin, A.; Peng, W.; Hewlett, W.; Levitt, P. Expression Mapping of 5-HT<sub>1</sub> Serotonin Receptor Subtypes  
43 during Fetal and Early Postnatal Mouse Forebrain Development. *Neuroscience* **2006**, *141* (2), 781–794.  
44 <https://doi.org/10.1016/j.neuroscience.2006.04.036>.
- 45 (24) Bar-Peled, O.; Gross-Isseroff, R.; Ben-Hur, H.; Hoskins, I.; Groner, Y.; Biegon, A. Fetal Human Brain  
46 Exhibits a Prenatal Peak in the Density of Serotonin 5-HT<sub>1A</sub> Receptors. *Neuroscience Letters* **1991**, *127* (2),  
47 173–176. [https://doi.org/10.1016/0304-3940\(91\)90787-T](https://doi.org/10.1016/0304-3940(91)90787-T).
- 48 (25) Dirkx, N.; Miceli, F.; Tagliatela, M.; Weckhuysen, S. The Role of Kv7.2 in Neurodevelopment: Insights  
49 and Gaps in Our Understanding. *Frontiers in Physiology* **2020**, *11*.
- 50 (26) Miceli, F.; Soldovieri, M. V.; Ambrosino, P.; De Maria, M.; Migliore, M.; Migliore, R.; Tagliatela, M.  
51 Early-Onset Epileptic Encephalopathy Caused by Gain-of-Function Mutations in the Voltage Sensor of  
52 Kv7.2 and Kv7.3 Potassium Channel Subunits. *J Neurosci* **2015**, *35* (9), 3782–3793.  
53 <https://doi.org/10.1523/JNEUROSCI.4423-14.2015>.
- 54 (27) Fleckenstein, J.; Sittl, R.; Averbek, B.; Lang, P. M.; Irnich, D.; Carr, R. W. Activation of Axonal Kv7  
55 Channels in Human Peripheral Nerve by Flupirtine but Not Placebo - Therapeutic Potential for Peripheral  
56 Neuropathies: Results of a Randomised Controlled Trial. *J Transl Med* **2013**, *11*, 34.  
57 <https://doi.org/10.1186/1479-5876-11-34>.

- 58 (28) Zhou, X.; Song, M.; Chen, D.; Wei, L.; Yu, S. P. Potential Role of KCNQ/M-Channels in Regulating  
59 Neuronal Differentiation in Mouse Hippocampal and Embryonic Stem Cell-Derived Neuronal Cultures.  
60 *Experimental Neurology* **2011**, 229 (2), 471–483. <https://doi.org/10.1016/j.expneurol.2011.03.018>.
- 61 (29) Baculis, B. C.; Zhang, J.; Chung, H. J. The Role of Kv7 Channels in Neural Plasticity and Behavior.  
62 *Frontiers in Physiology* **2020**, 11.
- 63 (30) *The 2020 CBD survey*. The Checkup. <https://www.singlecare.com/blog/cbd-survey/> (accessed 2022-11-  
64 22).
- 65 (31) Muller, C.; Morales, P.; Reggio, P. H. Cannabinoid Ligands Targeting TRP Channels. *Frontiers in*  
66 *Molecular Neuroscience* **2019**, 11.
- 67 (32) Vinogradova, E. P.; Zhukov, D. A.; Batuev, A. S. The Effects of Stages of the Estrous Cycle on Pain  
68 Thresholds in Female White Rats. *Neurosci Behav Physiol* **2003**, 33 (3), 269–272.  
69 <https://doi.org/10.1023/a:1022155432262>.
- 70 (33) Marsch, R.; Foeller, E.; Rammes, G.; Bunck, M.; Kössl, M.; Holsboer, F.; Zieglgänsberger, W.; Landgraf,  
71 R.; Lutz, B.; Wotjak, C. T. Reduced Anxiety, Conditioned Fear, and Hippocampal Long-Term Potentiation in  
72 Transient Receptor Potential Vanilloid Type 1 Receptor-Deficient Mice. *J Neurosci* **2007**, 27 (4), 832–839.  
73 <https://doi.org/10.1523/JNEUROSCI.3303-06.2007>.
- 74 (34) Lu, H.; Liu, Q. Serotonin in the Frontal Cortex: A Potential Therapeutic Target for Neurological  
75 Disorders. *Biochem Pharmacol (Los Angel)* **2017**, 6 (1), e184. [https://doi.org/10.4172/2167-  
76 0501.1000e184](https://doi.org/10.4172/2167-0501.1000e184).
- 77 (35) Oh, W. C.; Lutzu, S.; Castillo, P. E.; Kwon, H.-B. De Novo Synaptogenesis Induced by GABA in the  
78 Developing Mouse Cortex. *Science* **2016**, 353 (6303), 1037–1040.  
79 <https://doi.org/10.1126/science.aaf5206>.
- 80 (36) Kwon, H.-B.; Sabatini, B. L. Glutamate Induces de Novo Growth of Functional Spines in Developing  
81 Cortex. *Nature* **2011**, 474 (7349), 100–104. <https://doi.org/10.1038/nature09986>.
- 82 (37) Oh, W. C.; Hill, T. C.; Zito, K. Synapse-Specific and Size-Dependent Mechanisms of Spine Structural  
83 Plasticity Accompanying Synaptic Weakening. *Proc Natl Acad Sci U S A* **2013**, 110 (4), E305-312.  
84 <https://doi.org/10.1073/pnas.1214705110>.
- 85 (38) Kleinjan, M. S.; Buchta, W. C.; Ogelman, R.; Hwang, I.-W.; Kuwajima, M.; Hubbard, D. D.; Kareemo, D. J.;  
86 Prikhodko, O.; Olah, S. L.; Gomez Wulschner, L. E.; Abraham, W. C.; Franco, S. J.; Harris, K. M.; Oh, W. C.;  
87 Kennedy, M. J. Dually Innervated Dendritic Spines Develop in the Absence of Excitatory Activity and Resist  
88 Plasticity through Tonic Inhibitory Crosstalk. *Neuron* **2022**, S0896-6273(22)01001-7.  
89 <https://doi.org/10.1016/j.neuron.2022.11.002>.
- 90 (39) Yao, J.; Liu, B.; Qin, F. Modular Thermal Sensors in Temperature-Gated Transient Receptor Potential  
91 (TRP) Channels. *Proceedings of the National Academy of Sciences* **2011**, 108 (27), 11109–11114.  
92 <https://doi.org/10.1073/pnas.1105196108>.
- 93 (40) Xu, S.; Cheng, Y.; Keast, J. R.; Osborne, P. B. 17 $\beta$ -Estradiol Activates Estrogen Receptor  $\beta$ -Signalling and  
94 Inhibits Transient Receptor Potential Vanilloid Receptor 1 Activation by Capsaicin in Adult Rat Nociceptor  
95 Neurons. *Endocrinology* **2008**, 149 (11), 5540–5548. <https://doi.org/10.1210/en.2008-0278>.
- 96 (41) Payrits, M.; Sághy, É.; Csekő, K.; Pohóczky, K.; Bölcskei, K.; Ernst, D.; Barabás, K.; Szolcsányi, J.;  
97 Ábrahám, I. M.; Helyes, Z.; Szőke, É. Estradiol Sensitizes the Transient Receptor Potential Vanilloid 1  
98 Receptor in Pain Responses. *Endocrinology* **2017**, 158 (10), 3249–3258. [https://doi.org/10.1210/en.2017-  
99 00101](https://doi.org/10.1210/en.2017-00101).
- 00 (42) Pumroy, R. A.; Samanta, A.; Liu, Y.; Hughes, T. E.; Zhao, S.; Yudin, Y.; Rohacs, T.; Han, S.; Moiseenkova-  
01 Bell, V. Y. Molecular Mechanism of TRPV2 Channel Modulation by Cannabidiol. *eLife* **2019**, 8, e48792.  
02 <https://doi.org/10.7554/eLife.48792>.

- 03 (43) Marics, I.; Malapert, P.; Reynders, A.; Gaillard, S.; Moqrich, A. Acute Heat-Evoked Temperature  
04 Sensation Is Impaired but Not Abolished in Mice Lacking TRPV1 and TRPV3 Channels. *PLoS One* **2014**, *9* (6),  
05 e99828. <https://doi.org/10.1371/journal.pone.0099828>.
- 06 (44) Morecraft, R. J.; Yeterian, E. H. Prefrontal Cortex. In *Encyclopedia of the Human Brain*; Ramachandran,  
07 V. S., Ed.; Academic Press: New York, 2002; pp 11–26. <https://doi.org/10.1016/B0-12-227210-2/00285-5>.
- 08 (45) Albert, P. R.; Vahid-Ansari, F.; Luckhart, C. Serotonin-Prefrontal Cortical Circuitry in Anxiety and  
09 Depression Phenotypes: Pivotal Role of Pre- and Post-Synaptic 5-HT1A Receptor Expression. *Frontiers in*  
10 *Behavioral Neuroscience* **2014**, *8*.
- 11 (46) Peng, H.; Bian, X.; Ma, F.; Wang, K.-W. Pharmacological Modulation of the Voltage-Gated Neuronal  
12 Kv7/KCNQ/M-Channel Alters the Intrinsic Excitability and Synaptic Responses of Pyramidal Neurons in Rat  
13 Prefrontal Cortex Slices. *Acta Pharmacol Sin* **2017**, *38* (9), 1248–1256.  
14 <https://doi.org/10.1038/aps.2017.72>.
- 15 (47) Wanner, N. M.; Colwell, M.; Drown, C.; Faulk, C. Developmental Cannabidiol Exposure Increases  
16 Anxiety and Modifies Genome-Wide Brain DNA Methylation in Adult Female Mice. *Clin Epigenetics* **2021**,  
17 *13*, 4. <https://doi.org/10.1186/s13148-020-00993-4>.
- 18 (48) Greene, D. L.; Hoshi, N. Modulation of Kv7 Channels and Excitability in the Brain. *Cell Mol Life Sci* **2017**,  
19 *74* (3), 495–508. <https://doi.org/10.1007/s00018-016-2359-y>.
- 20 (49) Springer, K.; Varghese, N.; Tzingounis, A. V. Flexible Stoichiometry: Implications for KCNQ2- and  
21 KCNQ3-Associated Neurodevelopmental Disorders. *DNE* **2021**, *43* (3–4), 191–200.  
22 <https://doi.org/10.1159/000515495>.
- 23 (50) Athilingam, J. C.; Ben-Shalom, R.; Keeshen, C. M.; Sohal, V. S.; Bender, K. J. Serotonin Enhances  
24 Excitability and Gamma Frequency Temporal Integration in Mouse Prefrontal Fast-Spiking Interneurons.  
25 *eLife* **2017**, *6*, e31991. <https://doi.org/10.7554/eLife.31991>.
- 26 (51) Hu, L.; Wang, B.; Zhang, Y. Serotonin 5-HT6 Receptors Affect Cognition in a Mouse Model of  
27 Alzheimer’s Disease by Regulating Cilia Function. *Alzheimer’s Research & Therapy* **2017**, *9* (1), 76.  
28 <https://doi.org/10.1186/s13195-017-0304-4>.
- 29 (52) Porter, R. J.; Lunn, B. S.; Walker, L. L. M.; Gray, J. M.; Ballard, C. G.; O’Brien, J. T. Cognitive Deficit  
30 Induced by Acute Tryptophan Depletion in Patients With Alzheimer’s Disease. *AJP* **2000**, *157* (4), 638–640.  
31 <https://doi.org/10.1176/appi.ajp.157.4.638>.
- 32 (53) Jans, L. A. W.; Korte-Bouws, G. A. H.; Korte, S. M.; Blokland, A. The Effects of Acute Tryptophan  
33 Depletion on Affective Behaviour and Cognition in Brown Norway and Sprague Dawley Rats. *Journal of*  
34 *Psychopharmacology* **2008**. <https://doi.org/10.1177/0269881108099424>.
- 35 (54) Jovanovic, H.; Lundberg, J.; Karlsson, P.; Cerin, Å.; Saijo, T.; Varrone, A.; Halldin, C.; Nordström, A.-L. Sex  
36 Differences in the Serotonin 1A Receptor and Serotonin Transporter Binding in the Human Brain Measured  
37 by PET. *NeuroImage* **2008**, *39* (3), 1408–1419. <https://doi.org/10.1016/j.neuroimage.2007.10.016>.
- 38 (55) Parsey, R. V.; Oquendo, M. A.; Simpson, N. R.; Ogden, R. T.; Van Heertum, R.; Arango, V.; Mann, J. J.  
39 Effects of Sex, Age, and Aggressive Traits in Man on Brain Serotonin 5-HT1A Receptor Binding Potential  
40 Measured by PET Using [C-11]WAY-100635. *Brain Research* **2002**, *954* (2), 173–182.  
41 [https://doi.org/10.1016/S0006-8993\(02\)03243-2](https://doi.org/10.1016/S0006-8993(02)03243-2).
- 42 (56) Günther, L.; Rothe, J.; Rex, A.; Voigt, J.-P.; Millan, M. J.; Fink, H.; Bert, B. 5-HT1A-Receptor over-  
43 Expressing Mice: Genotype and Sex Dependent Responses to Antidepressants in the Forced Swim-Test.  
44 *Neuropharmacology* **2011**, *61* (3), 433–441. <https://doi.org/10.1016/j.neuropharm.2011.03.004>.
- 45 (57) Almada, M.; Amaral, C.; Oliveira, A.; Fernandes, P. A.; Ramos, M. J.; Fonseca, B. M.; Correia-da-Silva, G.;  
46 Teixeira, N. Cannabidiol (CBD) but Not Tetrahydrocannabinol (THC) Dysregulate in Vitro Decidualization of

- 47 Human Endometrial Stromal Cells by Disruption of Estrogen Signaling. *Reproductive Toxicology* **2020**, *93*,  
48 75–82. <https://doi.org/10.1016/j.reprotox.2020.01.003>.
- 49 (58) Martin, S.; Jones, M.; Simpson, E.; van den Buuse, M. Impaired Spatial Reference Memory in  
50 Aromatase-Deficient (ArKO) Mice. *NeuroReport* **2003**, *14* (15), 1979–1982.
- 51 (59) Rosenfeld, C. S.; Shay, D. A.; Vieira-Potter, V. J. Cognitive Effects of Aromatase and Possible Role in  
52 Memory Disorders. *Front Endocrinol (Lausanne)* **2018**, *9*, 610. <https://doi.org/10.3389/fendo.2018.00610>.
- 53 (60) Russell, J. K.; Jones, C. K.; Newhouse, P. A. The Role of Estrogen in Brain and Cognitive Aging.  
54 *Neurotherapeutics* **2019**, *16* (3), 649–665. <https://doi.org/10.1007/s13311-019-00766-9>.
- 55 (61) Crider, A.; Pillai, A. Estrogen Signaling as a Therapeutic Target in Neurodevelopmental Disorders. *J*  
56 *Pharmacol Exp Ther* **2017**, *360* (1), 48–58. <https://doi.org/10.1124/jpet.116.237412>.
- 57 (62) Sheppard, P. A. S.; Choleris, E.; Galea, L. A. M. Structural Plasticity of the Hippocampus in Response to  
58 Estrogens in Female Rodents. *Molecular Brain* **2019**, *12* (1), 22. [https://doi.org/10.1186/s13041-019-0442-](https://doi.org/10.1186/s13041-019-0442-7)  
59 7.
- 60 (63) Marchand, G.; Masoud, A. T.; Govindan, M.; Ware, K.; King, A.; Ruther, S.; Brazil, G.; Ulibarri, H.; Parise,  
61 J.; Arroyo, A.; Coriell, C.; Goetz, S.; Karrys, A.; Sainz, K. Birth Outcomes of Neonates Exposed to Marijuana  
62 in Utero: A Systematic Review and Meta-Analysis. *JAMA Network Open* **2022**, *5* (1), e2145653.  
63 <https://doi.org/10.1001/jamanetworkopen.2021.45653>.
- 64 (64) Deiana, S.; Watanabe, A.; Yamasaki, Y.; Amada, N.; Arthur, M.; Fleming, S.; Woodcock, H.; Dorward, P.;  
65 Pigliacampo, B.; Close, S.; Platt, B.; Riedel, G. Plasma and Brain Pharmacokinetic Profile of Cannabidiol  
66 (CBD), Cannabidivarin (CBDV),  $\Delta^9$ -Tetrahydrocannabivarin (THCV) and Cannabigerol (CBG) in Rats and  
67 Mice Following Oral and Intraperitoneal Administration and CBD Action on Obsessive-Compulsive  
68 Behaviour. *Psychopharmacology (Berl)* **2012**, *219* (3), 859–873. [https://doi.org/10.1007/s00213-011-2415-](https://doi.org/10.1007/s00213-011-2415-0)  
69 0.
- 70 (65) Millar, S. A.; Stone, N. L.; Yates, A. S.; O’Sullivan, S. E. A Systematic Review on the Pharmacokinetics of  
71 Cannabidiol in Humans. *Front Pharmacol* **2018**, *9*, 1365. <https://doi.org/10.3389/fphar.2018.01365>.
- 72 (66) Ewing, L. E.; Skinner, C. M.; Quick, C. M.; Kennon-McGill, S.; McGill, M. R.; Walker, L. A.; ElSohly, M. A.;  
73 Gurley, B. J.; Koturbash, I. Hepatotoxicity of a Cannabidiol-Rich Cannabis Extract in the Mouse Model.  
74 *Molecules* **2019**, *24* (9), 1694. <https://doi.org/10.3390/molecules24091694>.
- 75 (67) Sempio, C.; Huestis, M. A.; Kaplan, B.; Klawitter, J.; Christians, U.; Henthorn, T. K. Urinary Clearance of  
76 11-nor-9-Carboxy- $\Delta^9$ -Tetrahydrocannabinol: A Detailed Pharmacokinetic Analysis. *Drug Test Anal* **2022**,  
77 *14* (8), 1368–1376. <https://doi.org/10.1002/dta.3259>.
- 78 (68) Byers, S. L.; Wiles, M. V.; Dunn, S. L.; Taft, R. A. Mouse Estrous Cycle Identification Tool and Images.  
79 *PLOS ONE* **2012**, *7* (4), e35538. <https://doi.org/10.1371/journal.pone.0035538>.
- 80 (69) Felicio, L. S.; Nelson, J. F.; Finch, C. E. Longitudinal Studies of Estrous Cyclicity in Aging C57BL/6J Mice:  
81 II. Cessation of Cyclicity and the Duration of Persistent Vaginal Cornification1. *Biology of Reproduction*  
82 **1984**, *31* (3), 446–453. <https://doi.org/10.1095/biolreprod31.3.446>.
- 83 (70) Woods, G. F.; Oh, W. C.; Boudewyn, L. C.; Mikula, S. K.; Zito, K. Loss of PSD-95 Enrichment Is Not a  
84 Prerequisite for Spine Retraction. *J Neurosci* **2011**, *31* (34), 12129–12138.  
85 <https://doi.org/10.1523/JNEUROSCI.6662-10.2011>.
- 86

87

Figure 1

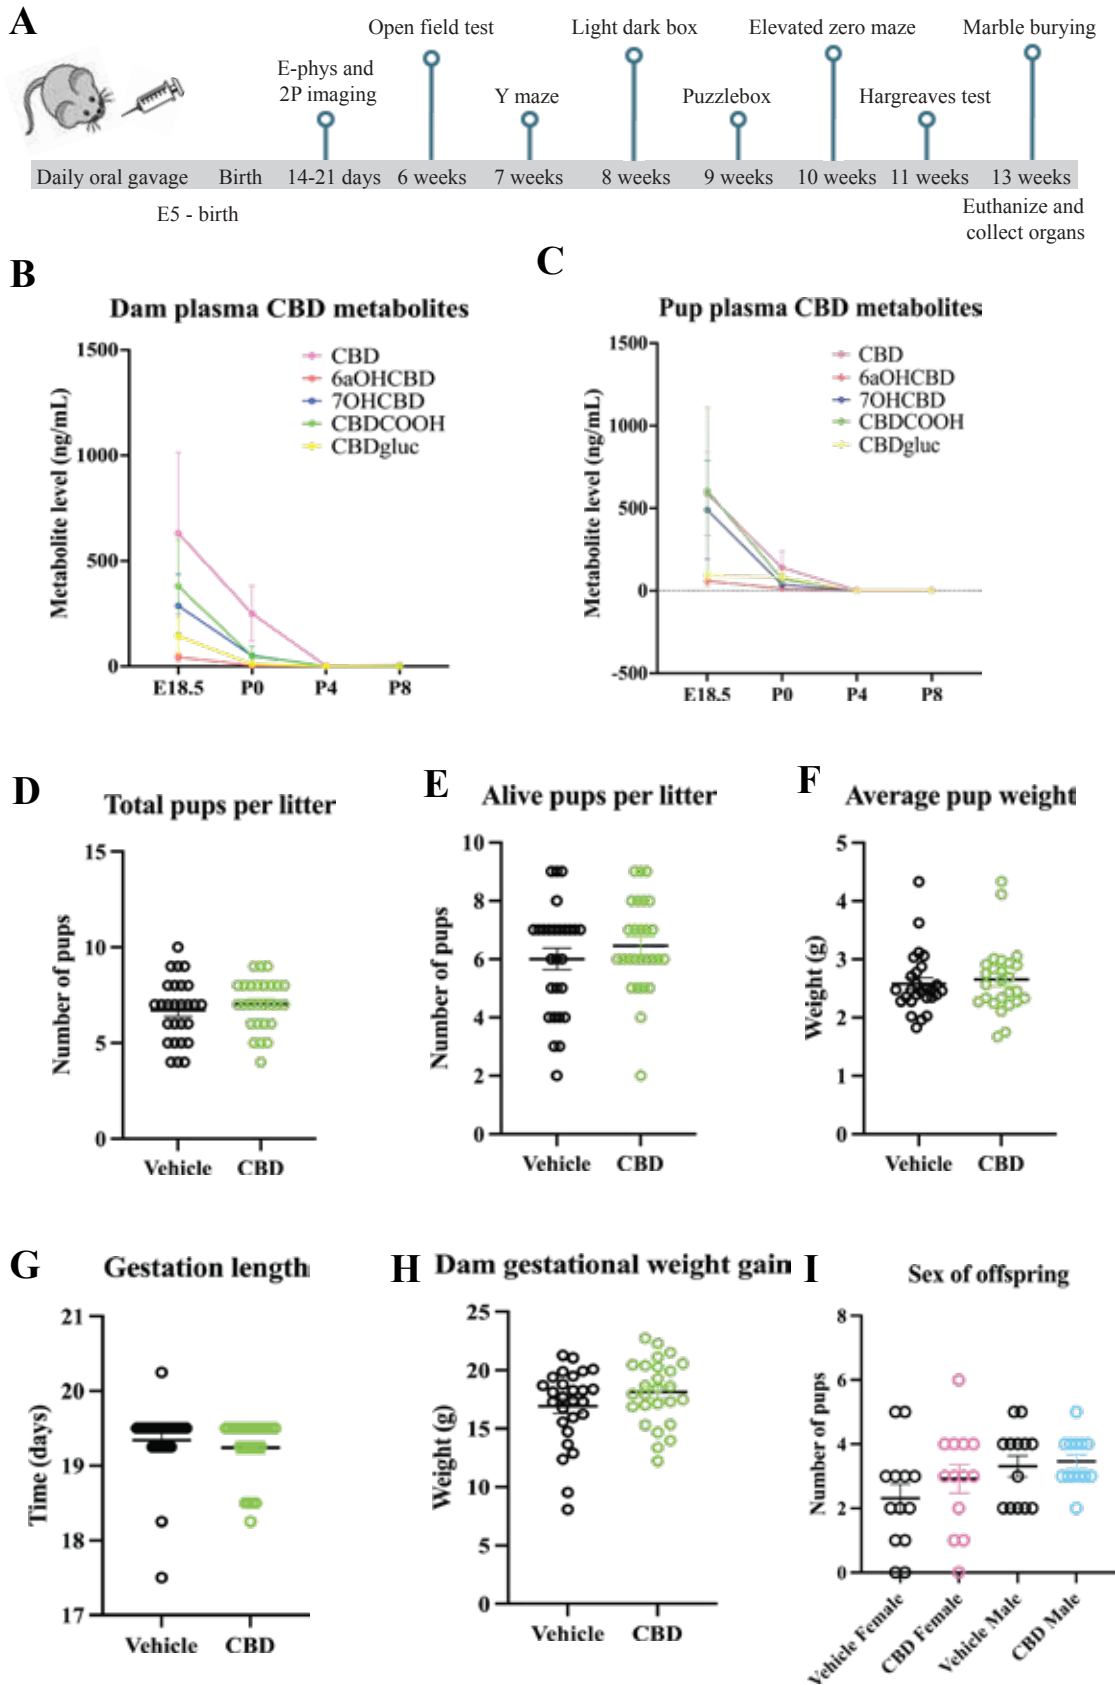

88 **Figure 1. Dosing schematic, validation of CBD metabolites and litter factors.** A timeline shows CBD  
89 administration and age of offspring when tests were performed (A). A graph shows CBD and CBD metabolites  
90 in the dam blood plasma from E18.5, P0, P4, and P8 (B) and pooled pup litter plasma from each group (C) from  
91 E18.5, P0, P4, and P8. Graphs show gestational CBD consumption does not alter total pups per litter (D), alive  
92 pups per litter (E), average pup weight (F), gestation length (G), gestation weight gain (H), or sex of offspring (I)  
93 from 27 vehicle administered dams and 26 CBD administered dams. Error bars represent S.E.M. The gestation  
94 length was  $19.3 \pm 0.092$  days (vehicle dams),  $19.27 \pm 0.073$  days (CBD dams),  $P=0.64$ , t-test. Gestational weight  
95 gain was  $16.93 \pm 0.6$  grams (vehicle dams),  $18.11 \pm 2.77$  grams (CBD dams),  $P=0.413$ , t-test. Total pups per litter  
96 was  $6.70 \pm 0.33$  (vehicle litters),  $7.037 \pm 0.25$  (CBD litters),  $P=0.61$ , t-test. Alive pups per litter was  $6.00 \pm 0.36$   
97 (vehicle litters),  $6.44 \pm 0.31$  (CBD litters),  $P=0.36$ , t-test. Vehicle dams birthed  $2.31 \pm 0.44$  female offspring and  
98  $3.31 \pm 0.33$  male offspring (N=13 litters), CBD dams birthed  $2.923 \pm 0.445$  female offspring and  $3.46 \pm 0.22$   
99 male offspring,  $P=0.34$  and  $P=0.70$ , respectively, t-tests.

00

Figure 2

Hargreaves test - 11 week old offspring

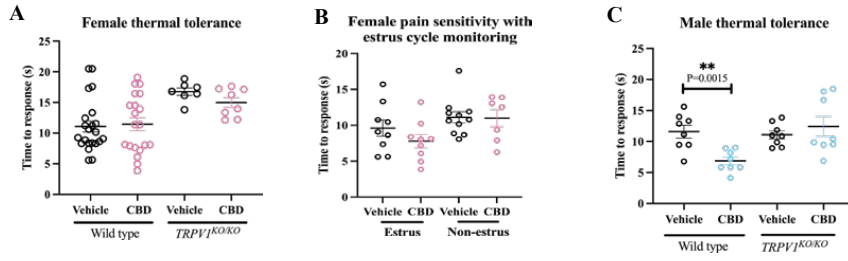

Open field test - 6 week old offspring

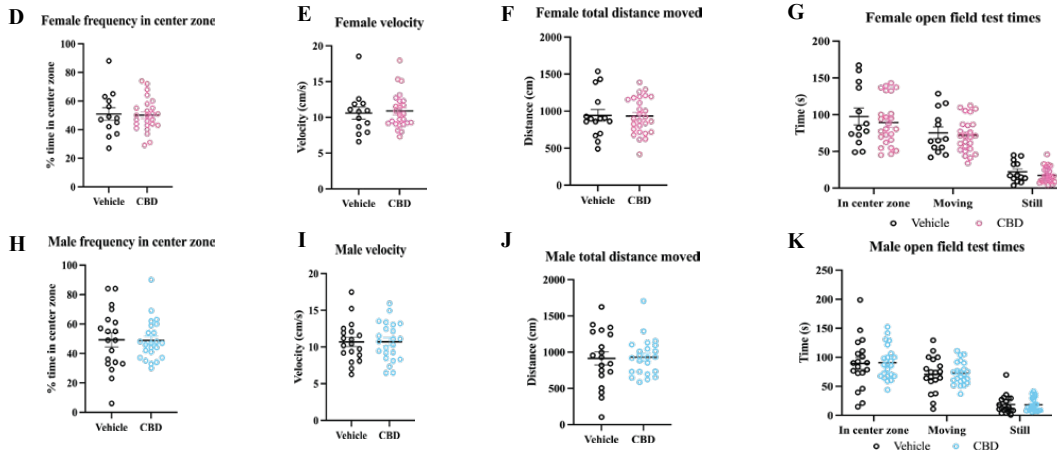

Light dark box data - 8 week old offspring

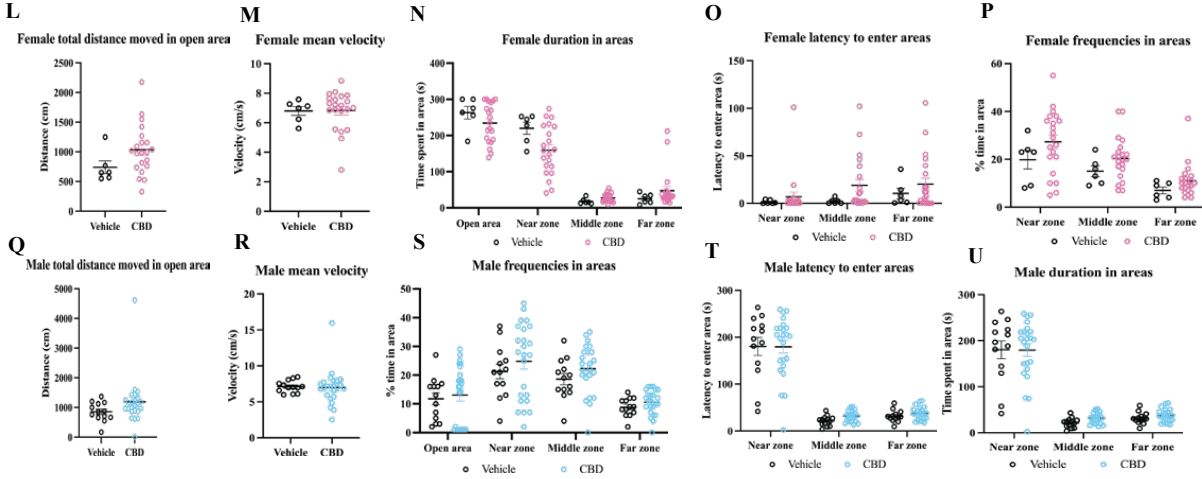

Elevated zero data - 10 week old offspring

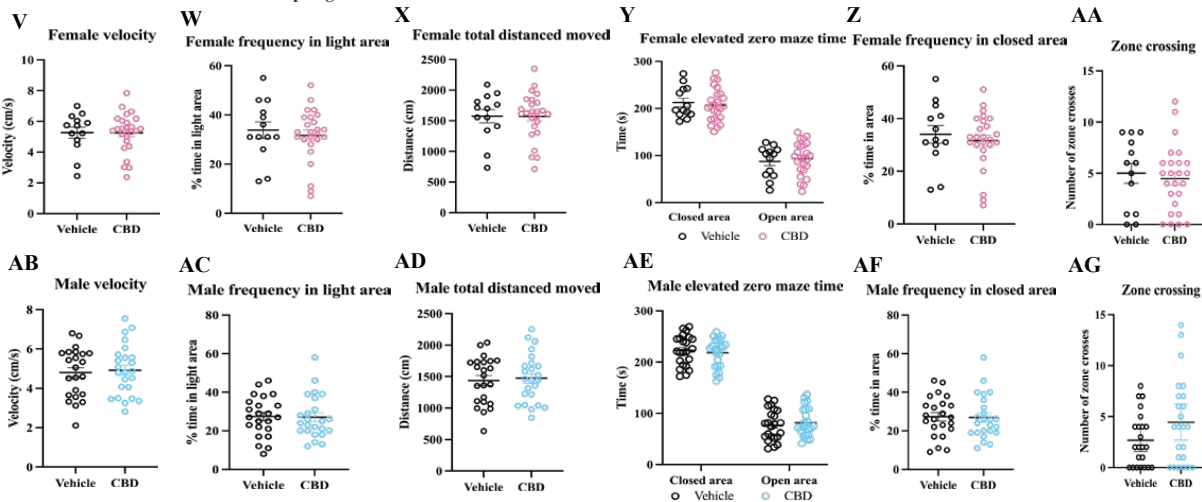



**Figure 2. Fetal CBD exposure increases thermal sensitivity in male mice, but not female mice.** Fetal CBD exposure does not affect latency to response to thermal stimulus in the Hargreaves test in wildtype or *TRPV1<sup>KO/KO</sup>* female mice (A), even when controlling for estrus cycle (B). Fetal CBD exposure decreases latency to response in wild type CBD-exposed male mice ( $11.58 \pm 0.64$  seconds for vehicle-exposed vs  $6.87 \pm 3.27$  seconds,  $P=4.993E-8$ , t-test), but does not affect latency response in *TRPV1<sup>KO/KO</sup>* mice ( $11.089 \pm 0.649$  seconds vehicle-exposed, vs.  $12.429 \pm 1.610$  seconds CBD-exposed  $P=0.453$ , t-test) (C). Graphs show fetal CBD exposure does not affect female offspring frequency in center zone (D), velocity (E), distance moved (F), or time in center zone, time moving, or time still (G) in the open field test. Graphs show that male offspring frequency in center zone (H), velocity (I), distance moved (J), or time in center zone, time moving, or time still (K) in the open field test. Graphs show fetal CBD exposure does not affect female offspring distance moved in open area (L), velocity (M), duration in open area, or zones (N), latency to enter the zones (O), or frequency entering zones (P), nor male offspring distance in open area (Q), mean velocity (R), duration in open area, or zones (S), latency to enter zones (T), or frequency entering zones (U) in light/dark box. The elevated zero maze shows that fetal CBD exposure does not affect female offspring velocity (V), frequency in light area (W), distance moved (X), time in closed or open areas (Y), frequency in closed area (Z), or zone crossings (AA), nor male offspring velocity (AB), frequency in light area (AC), distance moved (AD), time in closed or open areas (AE), frequency in closed area (AF), or zone crossings (AG).

21

Figure 3

Y maze test - 7 week old offspring

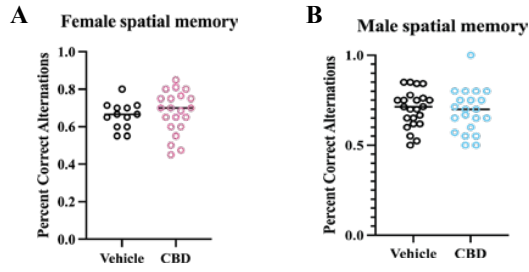

Marble burying test - 13 weeks old

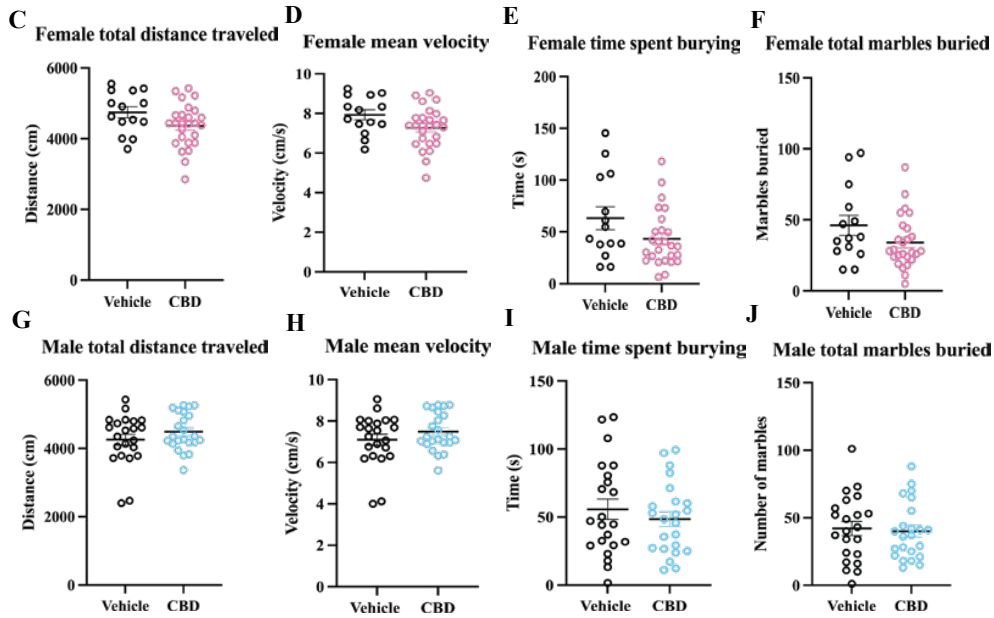

Puzzle box test - 9 week old offspring

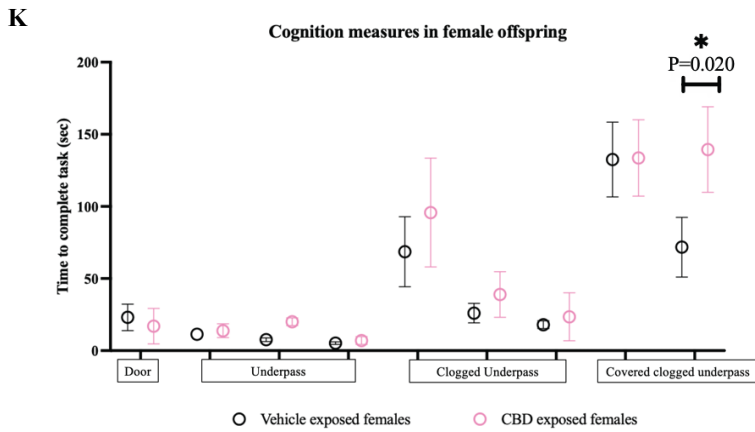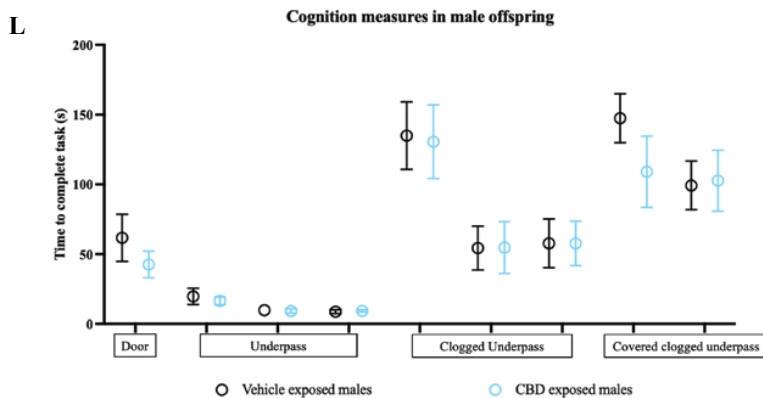

22

23 **Figure 3. Fetal CBD exposure decreases female offspring cognition.** Fetal CBD exposure does not affect  
24 female spatial memory (A) or male spatial memory (B) via the Y maze test. Graphs show fetal CBD exposure  
25 does not affect offspring compulsivity, including female total distance traveled (C), mean velocity (D), time spent  
26 burying (E) or marbles buried (F), nor male distance traveled (G), mean velocity (H), time spent burying (I) or  
27 total marbles buried (J), via the marble burying test. Graphs show fetal CBD exposure decreases female cognition  
28 at trial 9, ( $71.75 \pm 20.71$  seconds vehicle-exposed females,  $139.42 \pm 26.91$  seconds CBD-exposed females, N=12  
29 each, P=0.201, Wilcoxon rank sum test) (K), but not male cognition (L) via the puzzle box test.

30

31

32

Figure 4

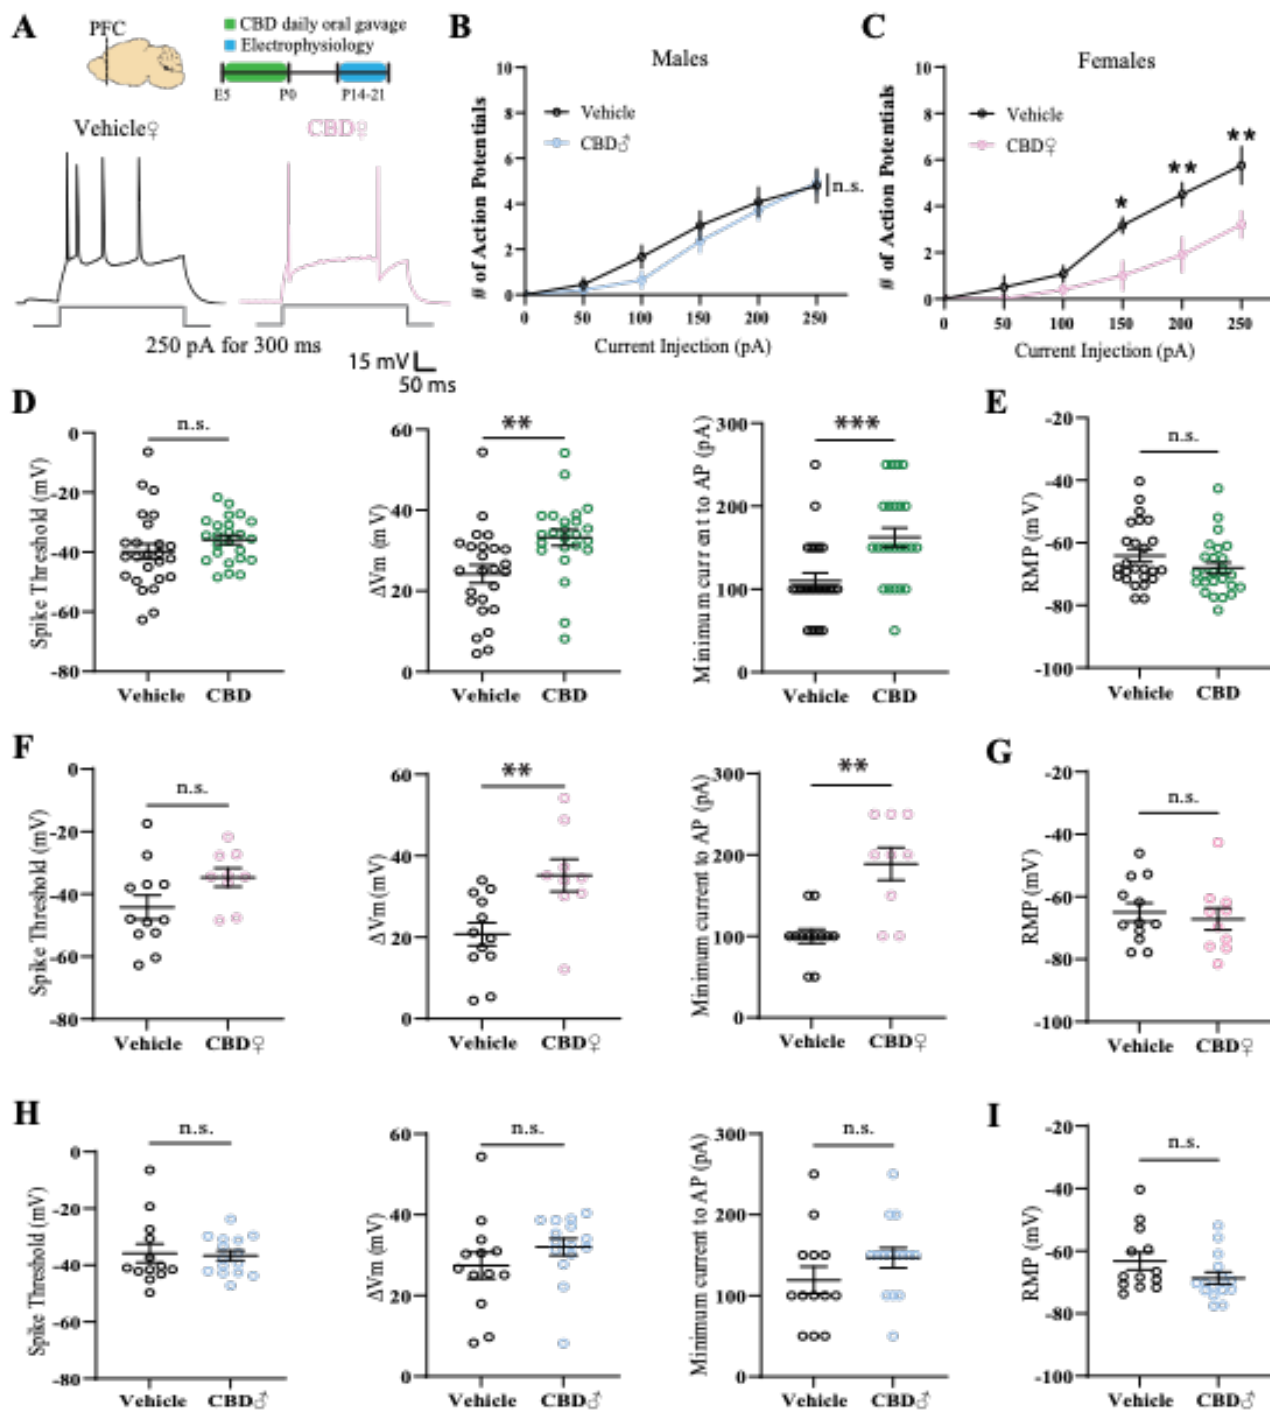

33 **Figure 4. Fetal CBD exposure decreases excitability of PFC layer 2/3 pyramidal neurons in a sex-dependent**

34 **manner.** (A) Experimental timeline and representative traces of a stimulus train elicited by 250pA current

35 injection for 300ms. (B and C) Fetal CBD exposure decreased the intrinsic excitability of layer 2/3 pyramidal  
36 neurons in P14 females but not males (vehicle females:  $n = 6$  cells, 1 mouse; vehicle males:  $n = 12$  cells, 2 mice;  
37 CBD females:  $n = 5$  cells, 1 mouse; CBD males:  $n = 14$  cells, 2 mice; female treatment effect:  $P < 0.0001$ ; Sidak's  
38 multiple comparison,  $* < 0.05$ ,  $** < 0.01$ ). (D) Fetal CBD exposure did not alter spike thresholds of P14-21 mice  
39 (left, vehicle:  $-39.84 \pm 2.613$  mV,  $n = 25$  cells, 4 mice; CBD:  $-35.92 \pm 1.523$  mV,  $n = 25$  cells, 4 mice; Welch's  
40 t-test,  $P = 0.2018$ ). Fetal CBD exposure significantly increased membrane potential change (middle, vehicle:  
41  $24.23 \pm 2.251$  mV; CBD:  $33.21 \pm 1.963$  mV; two-tailed t-test,  $P = 0.0043$ ) and minimum currents (right, vehicle:  
42  $110 \pm 9.574$  pA; CBD:  $162.5 \pm 11.36$ ; Mann Whitney,  $P = 0.0007$ ) required to evoke action potentials. (E) Resting  
43 membrane potential of P14-21 mice remained unchanged following fetal CBD exposure (vehicle:  $-64.07 \pm 2.008$   
44 mV,  $n = 25$  cells, 4 mice; CBD:  $-68.06 \pm 1.773$  mV,  $n = 25$  cells, 4 mice; Mann Whitney test,  $P = 0.1261$ ). (F)  
45 The effect of fetal CBD exposure on changes of membrane potential (vehicle:  $20.76 \pm 2.826$  mV,  $n = 12$  cells, 2  
46 mice; CBD:  $35.19 \pm 3.963$ ,  $n = 10$  cells, 2 mice; two-tailed t-test,  $P = 0.0066$ ) and minimum current for action  
47 potential firing stemmed from females (vehicle:  $100 \pm 8.704$  pA,  $n = 12$  cells, 2 mice; CBD:  $188.9 \pm 20.03$  pA,  $n$   
48  $= 10$  cells, 2 mice; Welch's t-test,  $P = 0.0018$ ). (G) Resting membrane potential was unchanged in females  
49 following fetal CBD exposure (vehicle:  $-65.97 \pm 2.966$  mV,  $n = 12$  cells, 2 mice; CBD:  $-67.16 \pm 3.506$  mV,  $n =$   
50  $10$  cells, 2 mice; two-tailed t-test,  $P = 0.6370$ ). (H and I) Male mice showed no significant differences in spike  
51 threshold (vehicle:  $-35.81 \pm 3.321$  mV,  $n = 13$  cells, 2 mice; CBD:  $-36.65 \pm 1.725$  pA,  $n = 15$  cells, 2 mice; Mann  
52 Whitney test,  $0.7856$ ), membrane potential (vehicle:  $27.43 \pm 3.309$  mV; CBD:  $32.02 \pm 2.115$  mV; Mann Whitney  
53 test,  $P = 0.0648$ ), and minimum currents for action potential spikes (vehicle:  $119.2 \pm 16.54$  pA; CBD:  $146.7 \pm$   
54  $12.41$  pA; two-tailed t-test,  $P = 0.1893$ ), or resting membrane potential (vehicle:  $-63.24 \pm 2.820$  mV; CBD:  $-68.67$   
55  $\pm 1.910$ , Mann Whitney test,  $P = 0.0977$ ).  $*P < 0.05$ ,  $**P < 0.01$ ,  $***P < 0.001$ ; error bars represent SEM. n.s.,  
56 not significant.

57

58

Figure 5

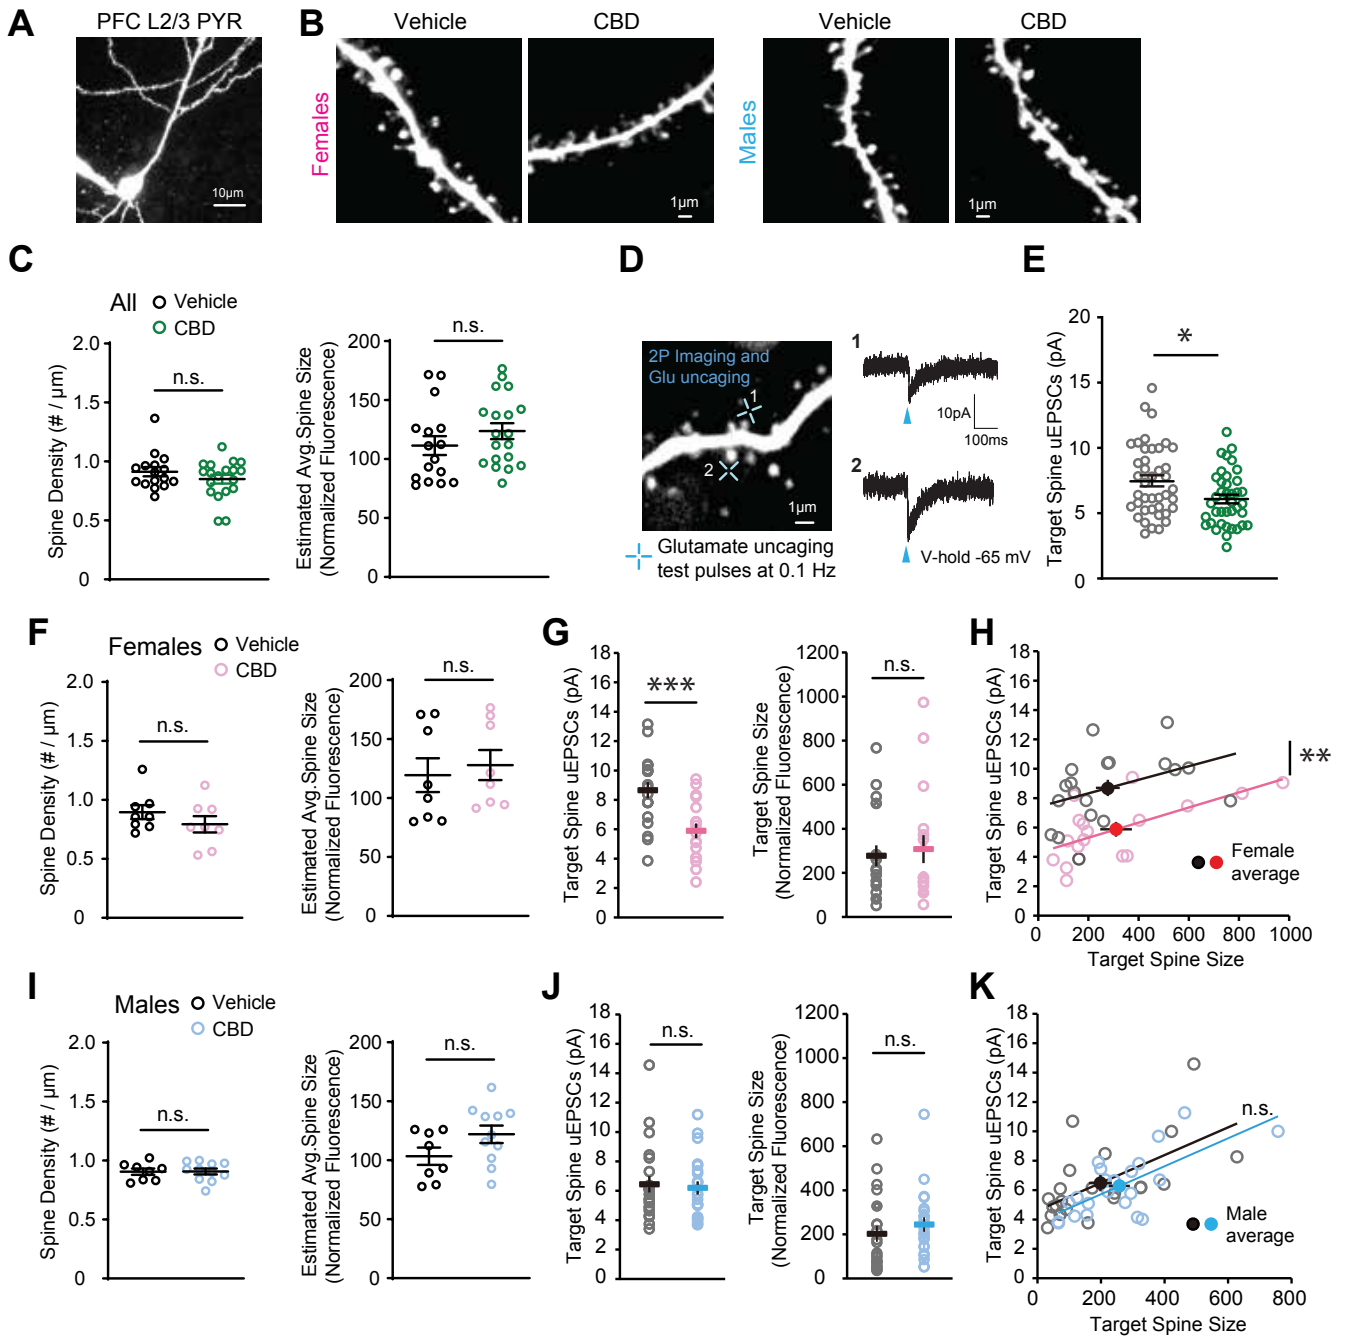

59

50 **Figure 5. Fetal CBD exposure decreases synaptic strength of layer 2/3 pyramidal neurons in PFC of female**

51 **mice.** (A and B) Two-photon images of a whole-cell PFC layer 2/3 pyramidal neuron and dendritic segments

52 from CBD and vehicle treated female and male mice at P14-22. (C) Fetal CBD exposure has no effect on spine

53 density for combined male and female mice (vehicle: n = 70 dendrites, 16 cells, 4 mice; CBD n = 84 dendrites,  
54 19 cells, 4 mice). (D) A two-photon image from a dendritic segment of PFC layer 2/3 pyramidal neuron and two-  
55 photon glutamate uncaging evoked EPSC (uEPSC) traces (average of 5 to 8 test pulses) recorded by whole-cell  
56 voltage-clamp recording (blue arrows indicate glutamate uncaging timepoint). (E) uEPSC amplitudes are  
57 significantly decreased in CBD-exposed offspring (vehicle:  $7.49 \pm 0.42$  pA ; CBD:  $6.09 \pm 0.33$  pA;  $P = 0.011$ , t-  
58 test) (vehicle: n = 41 spines, 14 cells, 3 mice; CBD n = 39 spines, 13 cells, 3 mice). (F) In female offspring, fetal  
59 CBD exposure has no effect on spine density or average spine size. (vehicle: n = 35 dendrites, 8 cells, 2 mice;  
60 CBD n = 36 dendrites, 8 cells, 2 mice). (G) uEPSCs recorded from similar sizes of target spines are significantly  
61 smaller in fetal CBD-exposed female offspring (vehicle:  $8.66 \pm 0.55$  pA; CBD:  $5.89 \pm 0.51$ ;  $P = 0.0009$ , t-test)  
62 (vehicle: n = 19 spines, 7 cells, 1 mouse; CBD n = 17 spines, 6 cells, 1 mouse). (H) Scatter plots showing  
63 significantly smaller uEPSCs in fetal CBD-exposed mice. (I) In male offspring, fetal CBD exposure had no effect  
64 on spine density or average spine size. (vehicle: n = 35 dendrites, 8 cells, 2 mice; CBD n = 48 dendrites, 11 cells,  
65 2 mice). (J) In male offspring, CBD has no effect on uEPSCs (vehicle: n = 22 spines, 7 cells, 2 mice; CBD n =  
66 22 spines, 7 cells, 2 mice). (K) Scatter plots showing comparable uEPSCs between fetal CBD-exposed and control  
67 mice. \* $P < 0.05$ , \*\* $P < 0.01$ ; \*\*\* $P < 0.001$ ; error bars represent SEM. n.s., not significant.

78

79

**Figure 6**

**A. Proposed model of how CBD activation of ion channels impacts postnatal behavior and excitability**

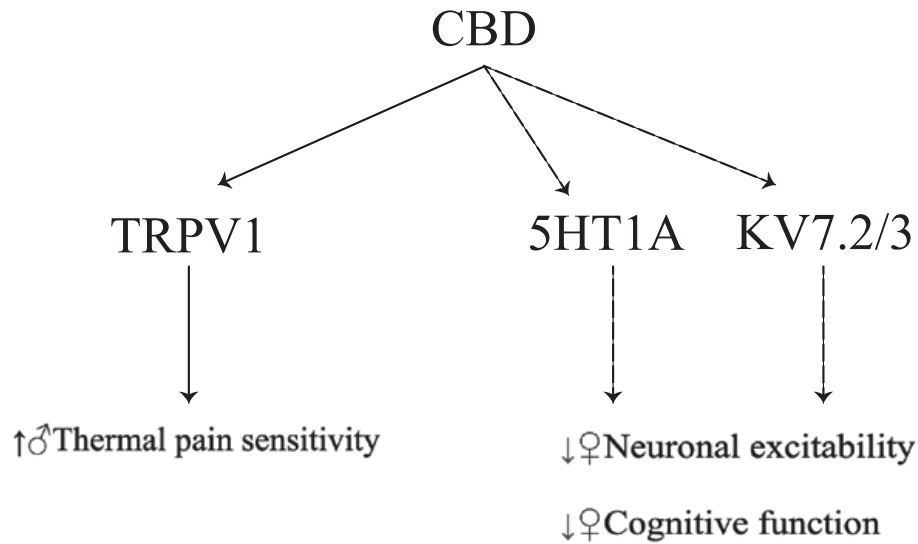

**B. Proposed model of how the increased catabolism of tryptophan by CBD affects neurodevelopment**

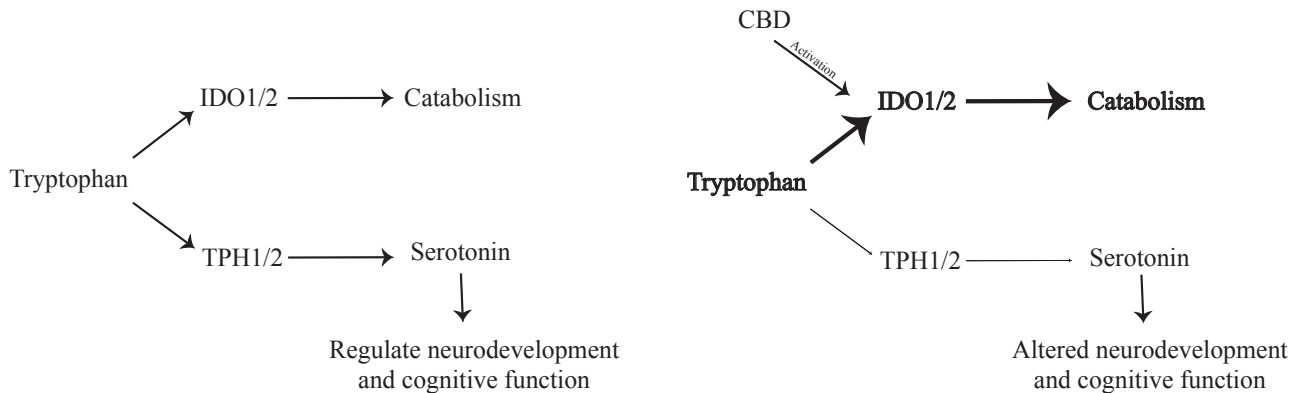

**C. Proposed model of how CBD exposure could alter sex specific hormonal regulations of development**

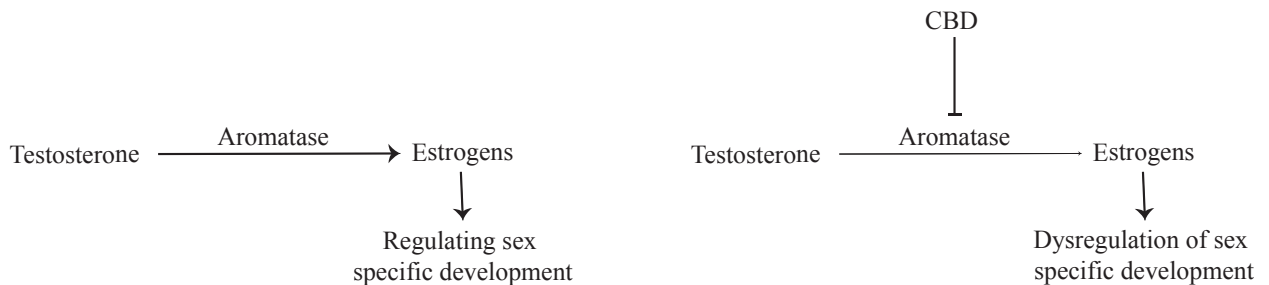



**Figure 6. Model of effects of fetal CBD exposure.** Fetal CBD exposure increases male thermal pain sensitivity, decreases female cognition, and alters female prefrontal cortex pyramidal neurons. CBD activates TRPV1, 5HT<sub>1A</sub>, and Kv7.2/3 receptors which each modulate effects of CBD that we observed (A). CBD activates the IDO1/2 pathway which could increase catabolism of tryptophan thereby reducing levels of serotonin to alter cognition (B). CBD inhibits aromatase which would reduce estrogen levels to potentially affect sex specific development.

**Supplemental table 1. Data for anxiety tests**

| Test               | Measure                           | Female Vehicle   | Female CBD      | Female vehicle to female CBD | Male Vehicle    | Male CBD         | Male vehicle to Male CBD | Distrobution | Test used              |
|--------------------|-----------------------------------|------------------|-----------------|------------------------------|-----------------|------------------|--------------------------|--------------|------------------------|
|                    |                                   | Value ± SEM      | Value ± SEM     | P value                      | Value ± SEM     | Value ± SEM      | P value                  |              |                        |
| Open field test    | Frequency in center zone          | 49.93 ± 3.83     | 50.12 ± 2.29    | 0.965                        | 49.26 ± 4.78    | 48.87 ± 2.88     | 0.942                    | Normal       | T-Test                 |
| Open field test    | Velocity                          | 11.34 ± 0.92     | 10.88 ± 0.51    | 0.525                        | 10.69 ± 0.63    | 10.71 ± 0.54     | 0.978                    | Nonnormal    | Wilcoxin rank sum test |
| Open field test    | Total distance moved              | 932.47 ± 81.25   | 925.19 ± 50.00  | 0.936                        | 913.97 ± 90.52  | 930.76 ± 53.62   | 0.869                    | Normal       | T-Test                 |
| Open field test    | Time in center zone               | 90.20 ± 11.05    | 89.19 ± 6.36    | 0.933                        | 89.40 ± 10.05   | 90.76 ± 6.00     | 0.904                    | Normal       | T-Test                 |
| Open field test    | Time moving                       | 70.46 ± 7.65     | 71.90 ± 4.62    | 0.865                        | 70.76 ± 6.95    | 72.53 ± 4.07     | 0.821                    | Normal       | T-Test                 |
| Open field test    | Time still                        | 19.72 ± 3.82     | 17.28 ± 2.10    | 0.225                        | 18.63 ± 3.72    | 18.23 ± 2.35     | 0.551                    | Nonnormal    | Wilcoxin rank sum test |
| Light dark box     | Total distance moved in open area | 740.45 ± 106.50  | 1033.55 ± 92.01 | 0.071                        | 854.22 ± 89.37  | 1191.09 ± 165.01 | 0.105                    | Nonnormal    | Wilcoxin rank sum test |
| Light dark box     | Mean velocity                     | 6.79 ± 0.30      | 6.83 ± 0.29     | 0.572                        | 7.12 ± 0.23     | 6.99 ± 0.50      | 0.484                    | Nonnormal    | Wilcoxin rank sum test |
| Light dark box     | Duration in open area             | 263.09 ± 17.52   | 234.12 ± 11.89  | 0.225                        | 233.82 ± 18.18  | 246.27 ± 14.30   | 0.239                    | Nonnormal    | Wilcoxin rank sum test |
| Light dark box     | Duration in near zone             | 219.84 ± 16.48   | 159.26 ± 15.01  | 0.052                        | 180.42 ± 19.22  | 179.64 ± 13.14   | 0.973                    | Normal       | T-Test                 |
| Light dark box     | Duration in middle zone           | 17.34 ± 3.37     | 27.23 ± 2.54    | 0.082                        | 21.65 ± 2.99    | 31.87 ± 2.38     | 0.014                    | Normal       | T-Test                 |
| Light dark box     | Duration in far zone              | 25.28 ± 5.92     | 47.62 ± 11.22   | 0.306                        | 31.75 ± 3.49    | 37.65 ± 2.78     | 0.156                    | Nonnormal    | Wilcoxin rank sum test |
| Light dark box     | Latency to enter near zone        | 1.49 ± 0.82      | 6.90 ± 4.79     | 0.978                        | 3.57 ± 2.82     | 3.61 ± 1.68      | 0.766                    | Nonnormal    | Wilcoxin rank sum test |
| Light dark box     | Latency to enter middle zone      | 2.15 ± 1.17      | 18.85 ± 6.12    | 0.112                        | 12.98 ± 4.98    | 13.35 ± 4.37     | 0.915                    | Nonnormal    | Wilcoxin rank sum test |
| Light dark box     | Latency to enter far zone         | 10.488 ± 5.497   | 20.30 ± 6.25    | 0.428                        | 16.19 ± 5.65    | 15.85 ± 4.60     | 0.965                    | Nonnormal    | Wilcoxin rank sum test |
| Light dark box     | Frequency in near zone            | 19.83 ± 3.84     | 27.33 ± 2.87    | 0.207                        | 21.23 ± 2.52    | 24.79 ± 2.67     | 0.391                    | Normal       | T-Test                 |
| Light dark box     | Frequency in middle zone          | 5.59 ± 2.28      | 20.33 ± 1.97    | 0.184                        | 18.62 ± 1.95    | 22.25 ± 1.72     | 0.196                    | Normal       | T-Test                 |
| Light dark box     | Frequency in far zone             | 7.00 ± 1.39      | 10.95 ± 1.55    | 0.124                        | 8.85 ± 0.89     | 10.54 ± 0.87     | 0.193                    | Nonnormal    | Wilcoxin rank sum test |
| Elevated zero maze | Velocity                          | 5.27 ± 0.36      | 5.25 ± 0.26     | 0.969                        | 4.79 ± 0.26     | 4.92 ± 0.26      | 0.733                    | Normal       | T-Test                 |
| Elevated zero maze | Frequency in light area           | 33.85 ± 3.35     | 31.68 ± 2.17    | 0.577                        | 27.43 ± 2.15    | 27.04 ± 2.29     | 0.901                    | Normal       | T-Test                 |
| Elevated zero maze | Total distance moved              | 1573.94 ± 108.78 | 1570.05 ± 77.47 | 0.976                        | 1437.06 ± 78.82 | 1474.54 ± 79.04  | 0.739                    | Normal       | T-Test                 |
| Elevated zero maze | Time in closed area               | 212.67 ± 9.16    | 206.69 ± 6.93   | 0.977                        | 222.98 ± 6.21   | 218.35 ± 5.76    | 0.395                    | Nonnormal    | Wilcoxin rank sum test |
| Elevated zero maze | Time in open area                 | 87.43 ± 9.16     | 93.41 ± 6.93    | 0.977                        | 77.12 ± 6.22    | 81.75 ± 5.76     | 0.395                    | Nonnormal    | Wilcoxin rank sum test |
| Elevated zero maze | Frequency in closed area          | 34 ± 3.34        | 31.6 ± 2.14     | 0.534                        | 27.30 ± 2.18    | 26.92 ± 2.32     | 0.904                    | Normal       | T-Test                 |

**Supplemental table 1. Summary of anxiety measure statistics.** Table shows all measures for the open field test, light dark box, and elevated zero maze split by sex and statistical analysis.

Supplemental figure 1. TRPV1 anxiety measures

Open field test

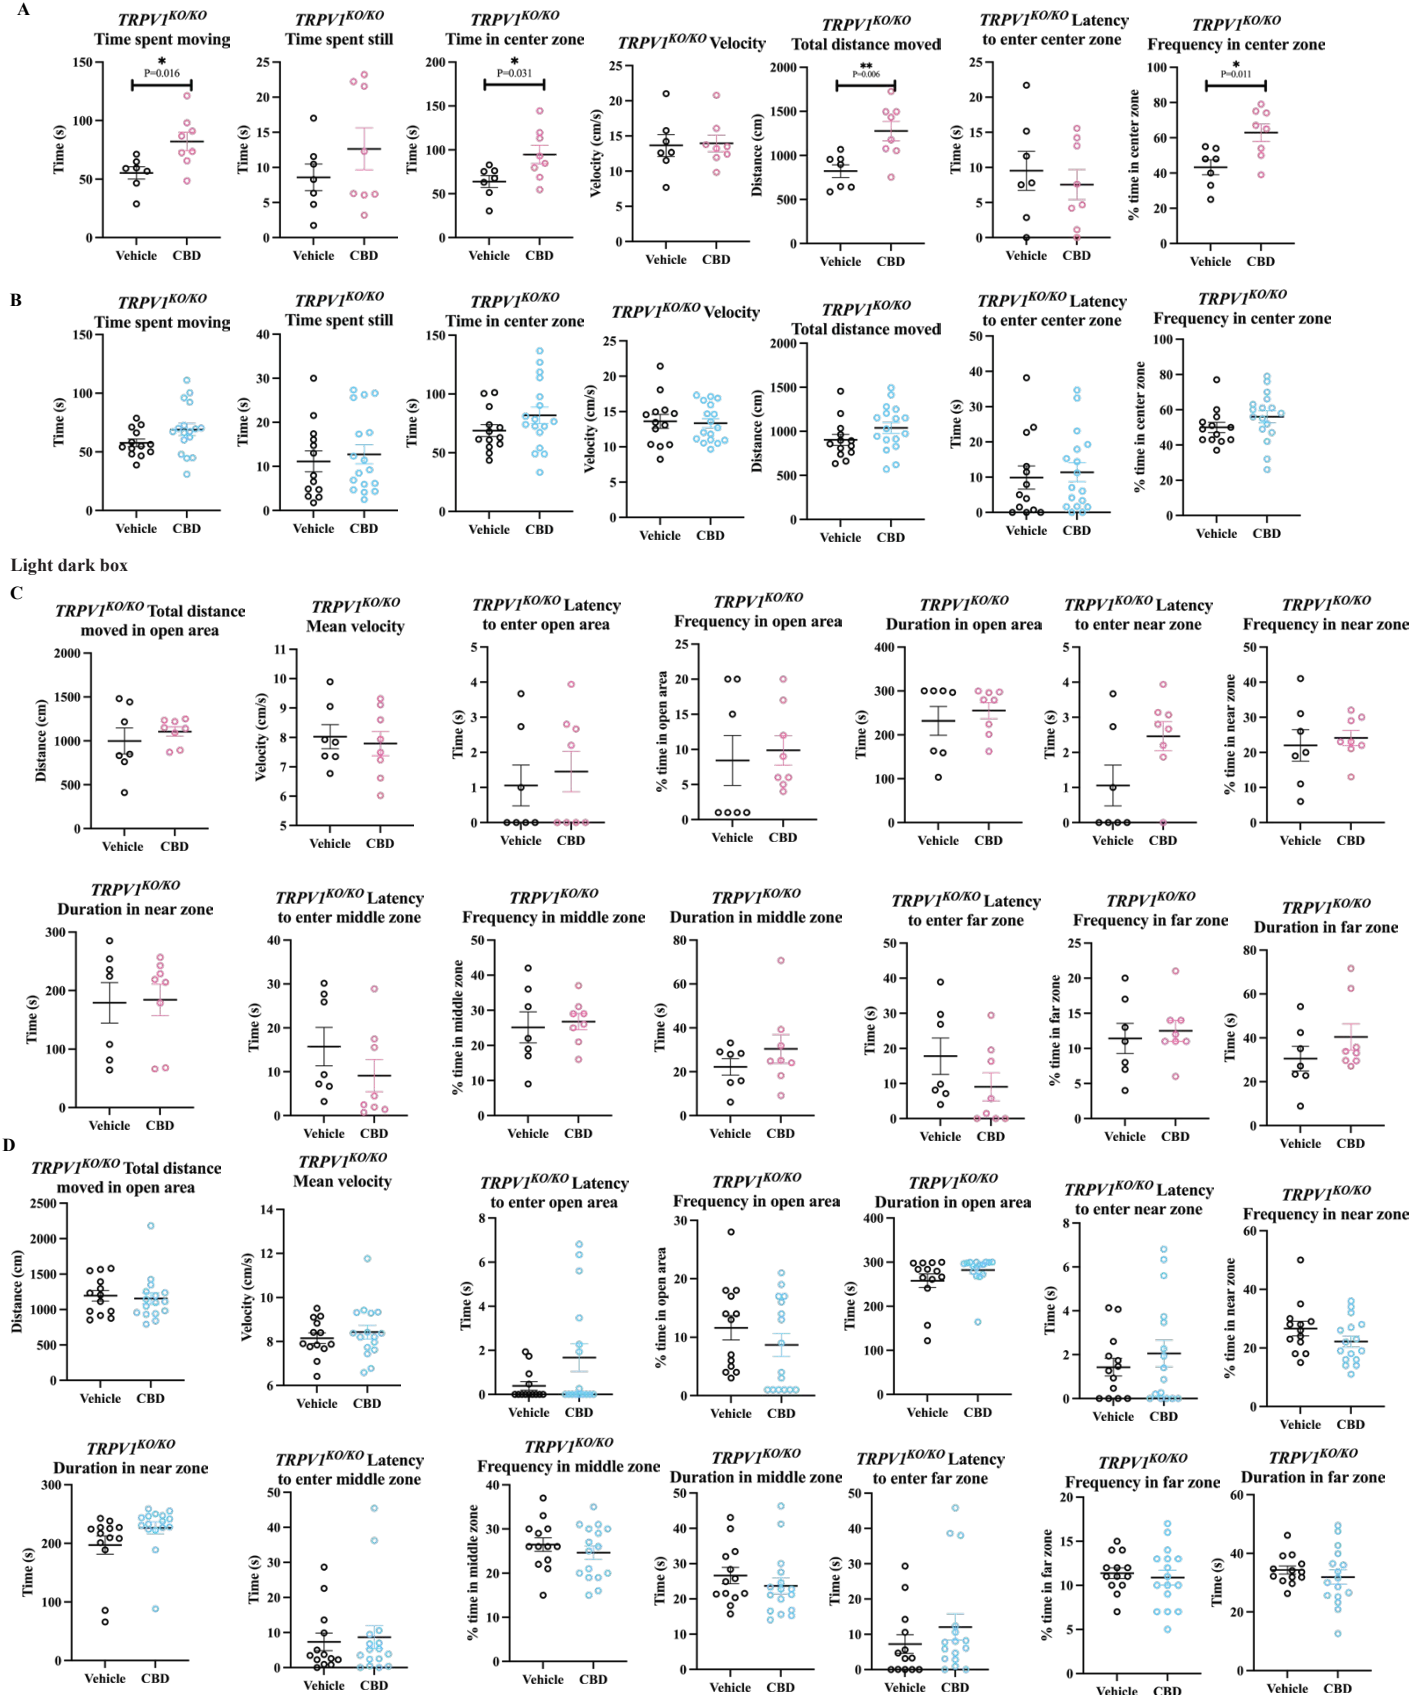

Elevated zero maze

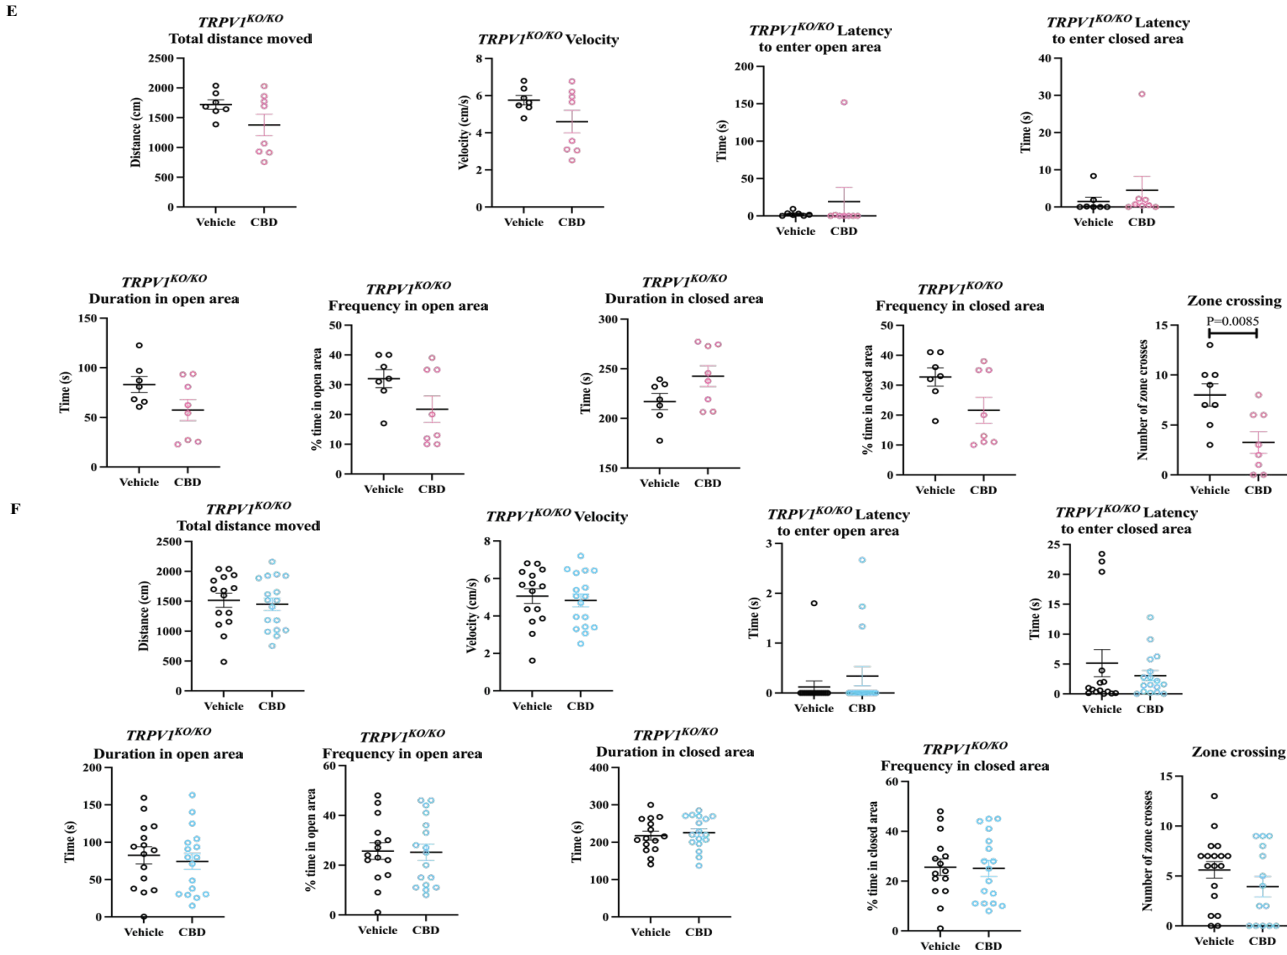

TRPV1 knockout mice anxiety behavior data

**G**

| Test               | Measure                           | Female vehicle    | Female CBD         | Female vehicle to female CBD | Male vehicle       | Male CBD           | Male vehicle to male CBD | Female vehicle to male vehicle | Distribution | Test used         |
|--------------------|-----------------------------------|-------------------|--------------------|------------------------------|--------------------|--------------------|--------------------------|--------------------------------|--------------|-------------------|
|                    |                                   | Value ± SEM       | Value ± SEM        | P value                      | Value ± SEM        | Value ± SEM        | P value                  | P value                        |              |                   |
| Elevated zero maze | Duration in closed area           | 216.912 ± 8.146   | 242.618 ± 10.622   | 0.083                        | 217.515 ± 11.574   | 225.59 ± 10.604    | 0.61                     | 0.974                          | Nonnormal    | Wilcoxon rank sum |
| Elevated zero maze | Frequency in closed area          | 32.714 ± 3.037    | 21.625 ± 4.359     | 0.064                        | 25.6 ± 3.324       | 25.118 ± 3.281     | 0.919                    | 0.197                          | Normal       | T test            |
| Elevated zero maze | Latency to enter closed area      | 1.478 ± 1.173     | 4.505 ± 3.706      | 0.476                        | 5.147 ± 2.272      | 3.062 ± 0.866      | 0.376                    | 0.301                          | Nonnormal    | Wilcoxon rank sum |
| Elevated zero maze | Duration in open area             | 83.169 ± 8.147    | 57.482 ± 10.622    | 0.083                        | 82.585 ± 11.574    | 74.408 ± 10.633    | 0.606                    | 0.974                          | Nonnormal    | Wilcoxon rank sum |
| Elevated zero maze | Frequency in open area            | 32.000 ± 3.032    | 21.75 ± 4.431      | 0.087                        | 25.667 ± 3.326     | 25.176 ± 3.319     | 0.918                    | 0.248                          | Normal       | T test            |
| Elevated zero maze | Latency to enter open area        | 2.688 ± 1.234     | 19.161 ± 18.971    | 0.434                        | 0.12 ± 0.12        | 0.338 ± 0.192      | 0.359                    | 0.006                          | Nonnormal    | Wilcoxon rank sum |
| Elevated zero maze | Total distance moved              | 1718.956 ± 79.648 | 1378.883 ± 179.907 | 0.124                        | 1515.678 ± 117.404 | 1448.718 ± 104.472 | 0.672                    | 0.277                          | Normal       | t test            |
| Elevated zero maze | Velocity                          | 5.754 ± 0.253     | 4.6 ± 0.601        | 0.117                        | 5.055 ± 0.392      | 4.831 ± 0.348      | 0.671                    | 0.261                          | Normal       | t test            |
| Light dark box     | Total distance moved in open area | 999.066 ± 148.666 | 1106.604 ± 52.344  | 0.484                        | 1194.476 ± 74.113  | 1155.823 ± 81.508  | 0.734                    | 0.202                          | Nonnormal    | Wilcoxon rank sum |
| Light dark box     | Duration in open area             | 231.879 ± 32.558  | 255.0467 ± 18.471  | 0.533                        | 257.966 ± 15.523   | 282.003 ± 8.366    | 0.163                    | 0.421                          | Nonnormal    | Wilcoxon rank sum |
| Light dark box     | Frequency in open area            | 8.429 ± 3.558     | 9.875 ± 2.1        | 0.724                        | 11.615 ± 2.086     | 8.688 ± 1.942      | 0.315                    | 0.418                          | Nonnormal    | Wilcoxon rank sum |
| Light dark box     | Latency to enter open area        | 1.058 ± 0.58      | 1.451 ± 0.574      | 0.639                        | 0.39 ± 0.194       | 1.668 ± 0.627      | 0.087                    | 0.193                          | Nonnormal    | Wilcoxon rank sum |
| Light dark box     | Duration in near zone             | 179.055 ± 34.481  | 184.226 ± 26.796   | 0.906                        | 197.012 ± 15.507   | 226.414 ± 10.105   | 0.112                    | 0.589                          | Normal       | T test            |
| Light dark box     | Frequency in near zone            | 22 ± 4.493        | 24.125 ± 2.158     | 0.664                        | 26.615 ± 2.485     | 22.188 ± 1.907     | 0.162                    | 0.339                          | Normal       | T test            |
| Light dark box     | Latency to enter near zone        | 1.058 ± 0.58      | 2.461 ± 0.415      | 0.066                        | 1.432 ± 0.404      | 2.056 ± 0.606      | 0.422                    | 0.597                          | Nonnormal    | Wilcoxon rank sum |
| Light dark box     | Duration in middle zone           | 22.241 ± 3.74     | 30.414 ± 6.549     | 0.317                        | 26.621 ± 2.318     | 23.699 ± 2.266     | 0.379                    | 0.308                          | Normal       | T test            |
| Light dark box     | Frequency in middle zone          | 25.143 ± 4.394    | 26.75 ± 2.258      | 0.741                        | 26.462 ± 1.559     | 24.625 ± 1.527     | 0.412                    | 0.733                          | Normal       | T test            |
| Light dark box     | Latency to enter middle zone      | 15.74 ± 4.384     | 9.117 ± 3.659      | 0.263                        | 7.371 ± 2.503      | 8.705 ± 3.266      | 0.757                    | 0.09                           | Nonnormal    | Wilcoxon rank sum |
| Light dark box     | Duration in far zone              | 30.583 ± 5.597    | 40.407 ± 5.96      | 0.255                        | 34.352 ± 1.415     | 31.89 ± 2.478      | 0.428                    | 0.411                          | Nonnormal    | Wilcoxon rank sum |
| Light dark box     | Frequency in far zone             | 11.429 ± 2.148    | 12.5 ± 1.5         | 0.683                        | 11.385 ± 0.605     | 10.875 ± 0.851     | 0.644                    | 0.98                           | Nonnormal    | Wilcoxon rank sum |
| Light dark box     | Latency to enter far zone         | 17.799 ± 5.189    | 9.067 ± 3.993      | 0.199                        | 7.243 ± 2.667      | 12.054 ± 3.7       | 0.322                    | 0.059                          | Nonnormal    | Wilcoxon rank sum |
| Light dark box     | Mean velocity                     | 8.029 ± 0.41      | 7.792 ± 0.415      | 0.692                        | 8.153 ± 0.241      | 8.429 ± 0.31       | 0.504                    | 0.783                          | Nonnormal    | Wilcoxon rank sum |
| Open field test    | Total distance moved              | 822.19 ± 72.655   | 1276.597 ± 111.421 | 0.006                        | 903.77 ± 62.519    | 1039.349 ± 62.529  | 0.143                    | 0.429                          | Normal       | T test            |
| Open field test    | Time in center zone               | 63.902 ± 6.783    | 94.828 ± 10.368    | 0.031                        | 68.869 ± 5.052     | 81.862 ± 7.051     | 0.169                    | 0.566                          | Normal       | T test            |
| Open field test    | Frequency in center zone          | 43.286 ± 4.219    | 62.875 ± 4.94      | 0.011                        | 50 ± 2.855         | 56.059 ± 3.41      | 0.202                    | 0.193                          | Normal       | T test            |
| Open field test    | Latency to enter center zone      | 9.524 ± 2.785     | 7.558 ± 2.141      | 0.58                         | 9.902 ± 3.291      | 11.4 ± 2.686       | 0.725                    | 0.94                           | Nonnormal    | Wilcoxon rank sum |
| Open field test    | Time spent moving                 | 55.303 ± 5.268    | 82.19 ± 7.836      | 0.016                        | 57.709 ± 3.214     | 69.093 ± 5.165     | 0.094                    | 0.684                          | Normal       | T test            |
| Open field test    | Time spent still                  | 8.59 ± 1.892      | 12.629 ± 2.981     | 0.289                        | 11.144 ± 2.368     | 12.762 ± 2.164     | 0.62                     | 0.48                           | Nonnormal    | Wilcoxon rank sum |
| Open field test    | Velocity                          | 13.649 ± 1.548    | 13.945 ± 1.159     | 0.878                        | 13.611 ± 0.987     | 13.351 ± 0.647     | 0.821                    | 0.983                          | Nonnormal    | Wilcoxon rank sum |

95 **Supplemental Figure 1. Fetal CBD exposure, overall, does not affect *TRPV1*<sup>KO/KO</sup> anxiety.**

96 Graphs show that fetal CBD exposure for *TRPV1*<sup>KO/KO</sup> female offspring increases time spent moving ( $55.503 \pm$   
97  $5.268$  seconds vehicle female,  $82.19 \pm 7.836$  seconds,  $P=0.016$ , t-test), does not affect time spent still, increases  
98 time in center zone  $63.902 \pm 6.783$  vehicle,  $94.828 \pm 10.368$ ,  $P=0.031$ , t-test), does not affect velocity, increases  
99 total distance moved  $822.19 \pm 72.66$  cm vehicle,  $1276.60 \pm 111.421$  cm CBD,  $P=0.006$ , t-test), does not affect  
100 latency to enter center zone, and increases frequency in center zone via the open field test ( $43.286 \pm 4.219$  vehicle,  
101  $62.875 \pm 4.94$ ,  $P=0.011$ , t-test) (A). Graphs show that fetal CBD exposure for *TRPV1*<sup>KO/KO</sup> male offspring does  
102 not alter time spent moving, time spent still, time in center zone, velocity, total distance moved, latency to enter  
103 center zone, and frequency in center zone via the open field test (B). Fetal CBD exposure does not affect female  
104 (C) or male (D) *TRPV1*<sup>KO/KO</sup> offspring total distance moved in open area, mean velocity, latency to enter open  
105 area, frequency in open area, duration in open area, latency to enter near zone, frequency in near zone, latency to  
106 enter middle zone, frequency in middle zone, duration in middle zone, latency to enter far zone, frequency in far  
107 zone, or duration in far zone in the light dark box. Fetal CBD exposure does not affect female (E), or male (F)  
108 *TRPV1*<sup>KO/KO</sup> offspring total distance moved, velocity, latency to enter open area, latency to enter closed area,  
109 duration in open area, frequency in open area, duration in closed area, or frequency in closed area in the elevated  
110 zero maze test. Fetal CBD exposure decreased the number of zone crosses of female *TRPV1*<sup>KO/KO</sup> offspring ( $8.000$   
111  $\pm 3.162$  vehicle,  $3.25 \pm 3.059$  CBD,  $P=0.009$ , t-test). Table shows statistical analyses of all *TRPV1*<sup>KO</sup> vehicle-  
112 exposed and CBD-exposed measures of anxiety (G).

13  
14  
15 **Acknowledgements**

16 We thank all members of the Bates lab for comments on the manuscript. We thank Dr. Nicolas Busquet from the  
17 Animal Behavior Core for essential advice on behavior experimental planning and for training us on the behavior  
18 apparatuses. We thank Dr. Cristina Sempio and Dr. Jost Klawitter for their advisement on CBD pharmacokinetics

19 and metabolite analyses. We thank Dr. Erica Wymore and Dr. David Kroll for their guidance and expertise on  
20 the clinical and pharmacologic aspects of CBD consumption during pregnancy. This work was supported by the  
21 Institute of Cannabis Research, the Colorado Clinical and Translational Sciences Institute (CTSA Grant TL1  
22 TR002533), and the University of Colorado Anschutz Medical Campus Diabetes Research Center.

### 24 **Author contributions**

25 Conceptualization, Methodology, Formal Analysis, Investigation, Data Curation, Resources; K.S.S. and E.A.B.  
26 Writing original draft, review and editing, visualization: K.S.S. and E.A.B. Supervision: E.A.B. Project  
27 administration: E.A.B. Funding Acquisition K.S.S. and E.A.B. Pyramidal neuron analyses, writing original draft,  
28 review, editing, and visualization: L.E.G.W., V.H., W.C.O. Hargreaves tests; L.F. and E.A.B. Marble burying  
29 data analysis, K.K.

### 31 **Declaration of interests**

32 The authors declare no competing interests.
